# Supplementary material
Source: publisher figshare collection journal article supplement (https://gsajournals.figshare.com/ndownloader/files/22247604)
Supplement: Supplementary file 1 [file 22247604]

#Supplementary Table S3. Differentially expressed genes in each over-represented GO term.,,,,,,,,,,
,AGI,sample,time for treatment,reference,regulated,category,description,name,term,definition
1,AT4G31500,Col_1h_rH_up,1h,Col under High R/FR,up,GO:0009641," cytochrome P450, family 83, subfamily B, polypeptide 1 ",ATR4;CYP83B1;RED1;RNT1;SUR2,shade avoidance,"Shade avoidance is a set of responses that plants display when they are subjected to the shade of another plant. It often includes elongation, altered flowering time, increased apical dominance and altered partitioning of resources. Plants are able to distinguish between the shade of an inanimate object (e.g. a rock) and the shade of another plant due to the altered balance between red and far-red light in the shade of a plant; this balance between red and far-red light is perceived by phytochrome."
2,AT5G47370,Col_1h_rH_up,1h,Col under High R/FR,up,GO:0009641, Homeobox-leucine zipper protein 4 (HB-4) / HD-ZIP protein ,HAT2,shade avoidance,"Shade avoidance is a set of responses that plants display when they are subjected to the shade of another plant. It often includes elongation, altered flowering time, increased apical dominance and altered partitioning of resources. Plants are able to distinguish between the shade of an inanimate object (e.g. a rock) and the shade of another plant due to the altered balance between red and far-red light in the shade of a plant; this balance between red and far-red light is perceived by phytochrome."
3,AT4G16780,Col_1h_rH_up,1h,Col under High R/FR,up,GO:0009641, homeobox protein 2 ,ATHB-2;ATHB2;HAT4;HB-2,shade avoidance,"Shade avoidance is a set of responses that plants display when they are subjected to the shade of another plant. It often includes elongation, altered flowering time, increased apical dominance and altered partitioning of resources. Plants are able to distinguish between the shade of an inanimate object (e.g. a rock) and the shade of another plant due to the altered balance between red and far-red light in the shade of a plant; this balance between red and far-red light is perceived by phytochrome."
4,AT5G12050,Col_1h_rH_up,1h,Col under High R/FR,up,GO:0009734, unknown protein; BEST Arabidopsis thaliana protein match is: unknown protein (TAIR:AT3G13980.1); Has 1807 Blast hits to 1807 proteins in 277 species: Archae - 0; Bacteria - 0; Metazoa - 736; Fungi - 347; Plants - 385; Viruses - 0; Other Eukaryotes - 339 (source: NCBI BLink). ,BG1,auxin-activated signaling pathway,"A series of molecular signals generated by the binding of the plant hormone auxin to a receptor, and ending with modulation of a downstream cellular process, e.g. transcription."
5,AT4G32280,Col_1h_rH_up,1h,Col under High R/FR,up,GO:0009734, indole-3-acetic acid inducible 29 ,IAA29,auxin-activated signaling pathway,"A series of molecular signals generated by the binding of the plant hormone auxin to a receptor, and ending with modulation of a downstream cellular process, e.g. transcription."
6,AT3G15540,Col_1h_rH_up,1h,Col under High R/FR,up,GO:0009734, indole-3-acetic acid inducible 19 ,IAA19;MSG2,auxin-activated signaling pathway,"A series of molecular signals generated by the binding of the plant hormone auxin to a receptor, and ending with modulation of a downstream cellular process, e.g. transcription."
7,AT5G18030,Col_1h_rH_up,1h,Col under High R/FR,up,GO:0009734, SAUR-like auxin-responsive protein family  ,SAUR21,auxin-activated signaling pathway,"A series of molecular signals generated by the binding of the plant hormone auxin to a receptor, and ending with modulation of a downstream cellular process, e.g. transcription."
8,AT5G47370,Col_1h_rH_up,1h,Col under High R/FR,up,GO:0009734, Homeobox-leucine zipper protein 4 (HB-4) / HD-ZIP protein ,HAT2,auxin-activated signaling pathway,"A series of molecular signals generated by the binding of the plant hormone auxin to a receptor, and ending with modulation of a downstream cellular process, e.g. transcription."
9,AT2G46790,Col_1h_rH_up,1h,Col under High R/FR,up,GO:0010017, pseudo-response regulator 9 ,APRR9;PRR9;TL1,red or far-red light signaling pathway,"The series of molecular signals initiated upon sensing by photoreceptor molecules of red light or far red light. Red light is electromagnetic radiation of wavelength of 580-700nm. Far red light is electromagnetic radiation of wavelength 700-800nm. An example of this response is seen at the beginning of many plant species developmental stages. These include germination, and the point when cotyledon expansion is triggered. In certain species these processes take place in response to absorption of red light by the pigment molecule phytochrome, but the signal can be reversed by exposure to far red light. During the initial phase the phytochrome molecule is only present in the red light absorbing form, but on absorption of red light it changes to a far red light absorbing form, triggering progress through development. An immediate short period of exposure to far red light entirely returns the pigment to its initial state and prevents triggering of the developmental process. A thirty minute break between red and subsequent far red light exposure renders the red light effect irreversible, and development then occurs regardless of whether far red light exposure subsequently occurs."
10,AT4G16780,Col_1h_rH_up,1h,Col under High R/FR,up,GO:0010017, homeobox protein 2 ,ATHB-2;ATHB2;HAT4;HB-2,red or far-red light signaling pathway,"The series of molecular signals initiated upon sensing by photoreceptor molecules of red light or far red light. Red light is electromagnetic radiation of wavelength of 580-700nm. Far red light is electromagnetic radiation of wavelength 700-800nm. An example of this response is seen at the beginning of many plant species developmental stages. These include germination, and the point when cotyledon expansion is triggered. In certain species these processes take place in response to absorption of red light by the pigment molecule phytochrome, but the signal can be reversed by exposure to far red light. During the initial phase the phytochrome molecule is only present in the red light absorbing form, but on absorption of red light it changes to a far red light absorbing form, triggering progress through development. An immediate short period of exposure to far red light entirely returns the pigment to its initial state and prevents triggering of the developmental process. A thirty minute break between red and subsequent far red light exposure renders the red light effect irreversible, and development then occurs regardless of whether far red light exposure subsequently occurs."
11,AT2G42540,Col_1h_rH_up,1h,Col under High R/FR,up,GO:0010017, cold-regulated 15a ,AtCOR15A;COR15;COR15A,red or far-red light signaling pathway,"The series of molecular signals initiated upon sensing by photoreceptor molecules of red light or far red light. Red light is electromagnetic radiation of wavelength of 580-700nm. Far red light is electromagnetic radiation of wavelength 700-800nm. An example of this response is seen at the beginning of many plant species developmental stages. These include germination, and the point when cotyledon expansion is triggered. In certain species these processes take place in response to absorption of red light by the pigment molecule phytochrome, but the signal can be reversed by exposure to far red light. During the initial phase the phytochrome molecule is only present in the red light absorbing form, but on absorption of red light it changes to a far red light absorbing form, triggering progress through development. An immediate short period of exposure to far red light entirely returns the pigment to its initial state and prevents triggering of the developmental process. A thirty minute break between red and subsequent far red light exposure renders the red light effect irreversible, and development then occurs regardless of whether far red light exposure subsequently occurs."
12,AT5G13930,Col_49h_rH_up,49h,Col under High R/FR,up,GO:0006979, Chalcone and stilbene synthase family protein ,ATCHS;CHS;TT4,response to oxidative stress,"Any process that results in a change in state or activity of a cell or an organism (in terms of movement, secretion, enzyme production, gene expression, etc.) as a result of oxidative stress, a state often resulting from exposure to high levels of reactive oxygen species, e.g. superoxide anions, hydrogen peroxide (H2O2), and hydroxyl radicals."
13,AT1G07890,Col_49h_rH_up,49h,Col under High R/FR,up,GO:0006979, ascorbate peroxidase 1 ,APX1;ATAPX01;ATAPX1;CS1;MEE6,response to oxidative stress,"Any process that results in a change in state or activity of a cell or an organism (in terms of movement, secretion, enzyme production, gene expression, etc.) as a result of oxidative stress, a state often resulting from exposure to high levels of reactive oxygen species, e.g. superoxide anions, hydrogen peroxide (H2O2), and hydroxyl radicals."
14,AT1G02930,Col_49h_rH_up,49h,Col under High R/FR,up,GO:0006979, glutathione S-transferase 6 ,ATGST1;ATGSTF3;ATGSTF6;ERD11;GST1;GSTF6,response to oxidative stress,"Any process that results in a change in state or activity of a cell or an organism (in terms of movement, secretion, enzyme production, gene expression, etc.) as a result of oxidative stress, a state often resulting from exposure to high levels of reactive oxygen species, e.g. superoxide anions, hydrogen peroxide (H2O2), and hydroxyl radicals."
15,AT3G57520,Col_49h_rH_up,49h,Col under High R/FR,up,GO:0006979, seed imbibition 2 ,AtSIP2;RS2;SIP2,response to oxidative stress,"Any process that results in a change in state or activity of a cell or an organism (in terms of movement, secretion, enzyme production, gene expression, etc.) as a result of oxidative stress, a state often resulting from exposure to high levels of reactive oxygen species, e.g. superoxide anions, hydrogen peroxide (H2O2), and hydroxyl radicals."
16,AT4G11010,Col_49h_rH_up,49h,Col under High R/FR,up,GO:0006979, nucleoside diphosphate kinase 3 ,NDPK3,response to oxidative stress,"Any process that results in a change in state or activity of a cell or an organism (in terms of movement, secretion, enzyme production, gene expression, etc.) as a result of oxidative stress, a state often resulting from exposure to high levels of reactive oxygen species, e.g. superoxide anions, hydrogen peroxide (H2O2), and hydroxyl radicals."
17,AT4G08390,Col_49h_rH_up,49h,Col under High R/FR,up,GO:0006979, stromal ascorbate peroxidase ,SAPX,response to oxidative stress,"Any process that results in a change in state or activity of a cell or an organism (in terms of movement, secretion, enzyme production, gene expression, etc.) as a result of oxidative stress, a state often resulting from exposure to high levels of reactive oxygen species, e.g. superoxide anions, hydrogen peroxide (H2O2), and hydroxyl radicals."
18,AT3G49120,Col_49h_rH_up,49h,Col under High R/FR,up,GO:0006979, peroxidase CB ,ATPCB;ATPERX34;PERX34;PRX34;PRXCB,response to oxidative stress,"Any process that results in a change in state or activity of a cell or an organism (in terms of movement, secretion, enzyme production, gene expression, etc.) as a result of oxidative stress, a state often resulting from exposure to high levels of reactive oxygen species, e.g. superoxide anions, hydrogen peroxide (H2O2), and hydroxyl radicals."
19,AT2G37040,Col_49h_rH_up,49h,Col under High R/FR,up,GO:0006979, PHE ammonia lyase 1 ,ATPAL1;PAL1,response to oxidative stress,"Any process that results in a change in state or activity of a cell or an organism (in terms of movement, secretion, enzyme production, gene expression, etc.) as a result of oxidative stress, a state often resulting from exposure to high levels of reactive oxygen species, e.g. superoxide anions, hydrogen peroxide (H2O2), and hydroxyl radicals."
20,AT5G17220,Col_49h_rH_up,49h,Col under High R/FR,up,GO:0009407, glutathione S-transferase phi 12 ,ATGSTF12;GST26;GSTF12;TT19,toxin catabolic process,"The chemical reactions and pathways resulting in the breakdown of toxin, a poisonous compound (typically a protein) that is produced by cells or organisms and that can cause disease when introduced into the body or tissues of an organism."
21,AT1G02930,Col_49h_rH_up,49h,Col under High R/FR,up,GO:0009407, glutathione S-transferase 6 ,ATGST1;ATGSTF3;ATGSTF6;ERD11;GST1;GSTF6,toxin catabolic process,"The chemical reactions and pathways resulting in the breakdown of toxin, a poisonous compound (typically a protein) that is produced by cells or organisms and that can cause disease when introduced into the body or tissues of an organism."
22,AT1G78370,Col_49h_rH_up,49h,Col under High R/FR,up,GO:0009407, glutathione S-transferase TAU 20 ,ATGSTU20;GSTU20,toxin catabolic process,"The chemical reactions and pathways resulting in the breakdown of toxin, a poisonous compound (typically a protein) that is produced by cells or organisms and that can cause disease when introduced into the body or tissues of an organism."
23,AT5G42800,Col_49h_rH_up,49h,Col under High R/FR,up,GO:0009718, dihydroflavonol 4-reductase ,DFR;M318;TT3,anthocyanin-containing compound biosynthetic process,"The chemical reactions and pathways resulting in the formation of anthocyanins, any member of a group of intensely colored soluble glycosides of anthocyanidins."
24,AT4G14090,Col_49h_rH_up,49h,Col under High R/FR,up,GO:0009718, UDP-Glycosyltransferase superfamily protein ,NA,anthocyanin-containing compound biosynthetic process,"The chemical reactions and pathways resulting in the formation of anthocyanins, any member of a group of intensely colored soluble glycosides of anthocyanidins."
25,AT4G22880,Col_49h_rH_up,49h,Col under High R/FR,up,GO:0009718, leucoanthocyanidin dioxygenase ,ANS;LDOX;TDS4;TT18,anthocyanin-containing compound biosynthetic process,"The chemical reactions and pathways resulting in the formation of anthocyanins, any member of a group of intensely colored soluble glycosides of anthocyanidins."
26,AT5G54060,Col_49h_rH_up,49h,Col under High R/FR,up,GO:0009718, UDP-glucose:flavonoid 3-o-glucosyltransferase ,UF3GT;UGT79B1,anthocyanin-containing compound biosynthetic process,"The chemical reactions and pathways resulting in the formation of anthocyanins, any member of a group of intensely colored soluble glycosides of anthocyanidins."
27,AT1G07890,Col_49h_rH_up,49h,Col under High R/FR,up,GO:0009735, ascorbate peroxidase 1 ,APX1;ATAPX01;ATAPX1;CS1;MEE6,response to cytokinin,"Any process that results in a change in state or activity of a cell or an organism (in terms of movement, secretion, enzyme production, gene expression, etc.) as a result of a cytokinin stimulus."
28,AT5G01600,Col_49h_rH_up,49h,Col under High R/FR,up,GO:0009735, ferretin 1 ,ATFER1;FER1,response to cytokinin,"Any process that results in a change in state or activity of a cell or an organism (in terms of movement, secretion, enzyme production, gene expression, etc.) as a result of a cytokinin stimulus."
29,AT4G08390,Col_49h_rH_up,49h,Col under High R/FR,up,GO:0009735, stromal ascorbate peroxidase ,SAPX,response to cytokinin,"Any process that results in a change in state or activity of a cell or an organism (in terms of movement, secretion, enzyme production, gene expression, etc.) as a result of a cytokinin stimulus."
30,AT4G34870,Col_49h_rH_up,49h,Col under High R/FR,up,GO:0009735, rotamase cyclophilin 5 ,ATCYP1;ROC5,response to cytokinin,"Any process that results in a change in state or activity of a cell or an organism (in terms of movement, secretion, enzyme production, gene expression, etc.) as a result of a cytokinin stimulus."
31,AT3G49120,Col_49h_rH_up,49h,Col under High R/FR,up,GO:0009735, peroxidase CB ,ATPCB;ATPERX34;PERX34;PRX34;PRXCB,response to cytokinin,"Any process that results in a change in state or activity of a cell or an organism (in terms of movement, secretion, enzyme production, gene expression, etc.) as a result of a cytokinin stimulus."
32,AT1G78370,Col_49h_rH_up,49h,Col under High R/FR,up,GO:0009735, glutathione S-transferase TAU 20 ,ATGSTU20;GSTU20,response to cytokinin,"Any process that results in a change in state or activity of a cell or an organism (in terms of movement, secretion, enzyme production, gene expression, etc.) as a result of a cytokinin stimulus."
33,AT5G13930,Col_49h_rH_up,49h,Col under High R/FR,up,GO:0009813, Chalcone and stilbene synthase family protein ,ATCHS;CHS;TT4,flavonoid biosynthetic process,"The chemical reactions and pathways resulting in the formation of flavonoids, a group of phenolic derivatives containing a flavan skeleton."
34,AT5G08640,Col_49h_rH_up,49h,Col under High R/FR,up,GO:0009813, flavonol synthase 1 ,ATFLS1;FLS;FLS1,flavonoid biosynthetic process,"The chemical reactions and pathways resulting in the formation of flavonoids, a group of phenolic derivatives containing a flavan skeleton."
35,AT3G51240,Col_49h_rH_up,49h,Col under High R/FR,up,GO:0009813, flavanone 3-hydroxylase ,F3'H;F3H;TT6,flavonoid biosynthetic process,"The chemical reactions and pathways resulting in the formation of flavonoids, a group of phenolic derivatives containing a flavan skeleton."
36,AT5G08640,Col_49h_rH_up,49h,Col under High R/FR,up,GO:0080167, flavonol synthase 1 ,ATFLS1;FLS;FLS1,response to karrikin,"Any process that results in a change in state or activity of a cell or an organism (in terms of movement, secretion, enzyme production, gene expression, etc.) as a result of a karrikin stimulus. Karrikins are signaling molecules in smoke from burning vegetation that trigger seed germination for many angiosperms (flowering plants)."
37,AT3G22840,Col_49h_rH_up,49h,Col under High R/FR,up,GO:0080167, Chlorophyll A-B binding family protein ,ELIP;ELIP1,response to karrikin,"Any process that results in a change in state or activity of a cell or an organism (in terms of movement, secretion, enzyme production, gene expression, etc.) as a result of a karrikin stimulus. Karrikins are signaling molecules in smoke from burning vegetation that trigger seed germination for many angiosperms (flowering plants)."
38,AT3G57520,Col_49h_rH_up,49h,Col under High R/FR,up,GO:0080167, seed imbibition 2 ,AtSIP2;RS2;SIP2,response to karrikin,"Any process that results in a change in state or activity of a cell or an organism (in terms of movement, secretion, enzyme production, gene expression, etc.) as a result of a karrikin stimulus. Karrikins are signaling molecules in smoke from burning vegetation that trigger seed germination for many angiosperms (flowering plants)."
39,AT2G30490,Col_49h_rH_up,49h,Col under High R/FR,up,GO:0080167, cinnamate-4-hydroxylase ,ATC4H;C4H;CYP73A5;REF3,response to karrikin,"Any process that results in a change in state or activity of a cell or an organism (in terms of movement, secretion, enzyme production, gene expression, etc.) as a result of a karrikin stimulus. Karrikins are signaling molecules in smoke from burning vegetation that trigger seed germination for many angiosperms (flowering plants)."
40,AT2G37040,Col_49h_rH_up,49h,Col under High R/FR,up,GO:0080167, PHE ammonia lyase 1 ,ATPAL1;PAL1,response to karrikin,"Any process that results in a change in state or activity of a cell or an organism (in terms of movement, secretion, enzyme production, gene expression, etc.) as a result of a karrikin stimulus. Karrikins are signaling molecules in smoke from burning vegetation that trigger seed germination for many angiosperms (flowering plants)."
41,AT5G62210,Col_49h_rH_up,49h,Col under High R/FR,up,GO:0080167," Embryo-specific protein 3, (ATS3) ",NA,response to karrikin,"Any process that results in a change in state or activity of a cell or an organism (in terms of movement, secretion, enzyme production, gene expression, etc.) as a result of a karrikin stimulus. Karrikins are signaling molecules in smoke from burning vegetation that trigger seed germination for many angiosperms (flowering plants)."
42,AT4G39940,myc234_1h_rCol_rH_down,1h,Col under High R/FR,down,GO:0000103, APS-kinase 2 ,AKN2;APK2,sulfate assimilation,The pathways by which inorganic sulfate is processed and incorporated into sulfated compounds.
43,AT2G14750,myc234_1h_rCol_rH_down,1h,Col under High R/FR,down,GO:0000103, APS kinase ,AKN1;APK;APK1;ATAKN1,sulfate assimilation,The pathways by which inorganic sulfate is processed and incorporated into sulfated compounds.
44,AT4G04610,myc234_1h_rCol_rH_down,1h,Col under High R/FR,down,GO:0000103, APS reductase 1 ,APR;APR1;ATAPR1;PRH19,sulfate assimilation,The pathways by which inorganic sulfate is processed and incorporated into sulfated compounds.
45,AT4G14680,myc234_1h_rCol_rH_down,1h,Col under High R/FR,down,GO:0000103, Pseudouridine synthase/archaeosine transglycosylase-like family protein ,APS3;ATPS3,sulfate assimilation,The pathways by which inorganic sulfate is processed and incorporated into sulfated compounds.
46,AT3G22890,myc234_1h_rCol_rH_down,1h,Col under High R/FR,down,GO:0000103, ATP sulfurylase 1 ,APS1;ATPS1,sulfate assimilation,The pathways by which inorganic sulfate is processed and incorporated into sulfated compounds.
47,AT4G21990,myc234_1h_rCol_rH_down,1h,Col under High R/FR,down,GO:0000103, APS reductase 3 ,APR3;ATAPR3;PRH-26;PRH26,sulfate assimilation,The pathways by which inorganic sulfate is processed and incorporated into sulfated compounds.
48,AT2G31790,myc234_1h_rCol_rH_down,1h,Col under High R/FR,down,GO:0008152, UDP-Glycosyltransferase superfamily protein ,NA,metabolic process,"The chemical reactions and pathways, including anabolism and catabolism, by which living organisms transform chemical substances. Metabolic processes typically transform small molecules, but also include macromolecular processes such as DNA repair and replication, and protein synthesis and degradation."
49,AT1G22340,myc234_1h_rCol_rH_down,1h,Col under High R/FR,down,GO:0008152, UDP-glucosyl transferase 85A7 ,AtUGT85A7;UGT85A7,metabolic process,"The chemical reactions and pathways, including anabolism and catabolism, by which living organisms transform chemical substances. Metabolic processes typically transform small molecules, but also include macromolecular processes such as DNA repair and replication, and protein synthesis and degradation."
50,AT4G29700,myc234_1h_rCol_rH_down,1h,Col under High R/FR,down,GO:0008152, Alkaline-phosphatase-like family protein ,NA,metabolic process,"The chemical reactions and pathways, including anabolism and catabolism, by which living organisms transform chemical substances. Metabolic processes typically transform small molecules, but also include macromolecular processes such as DNA repair and replication, and protein synthesis and degradation."
51,AT4G27560,myc234_1h_rCol_rH_down,1h,Col under High R/FR,down,GO:0008152, UDP-Glycosyltransferase superfamily protein ,UGT79B2,metabolic process,"The chemical reactions and pathways, including anabolism and catabolism, by which living organisms transform chemical substances. Metabolic processes typically transform small molecules, but also include macromolecular processes such as DNA repair and replication, and protein synthesis and degradation."
52,AT1G21440,myc234_1h_rCol_rH_down,1h,Col under High R/FR,down,GO:0008152, Phosphoenolpyruvate carboxylase family protein ,NA,metabolic process,"The chemical reactions and pathways, including anabolism and catabolism, by which living organisms transform chemical substances. Metabolic processes typically transform small molecules, but also include macromolecular processes such as DNA repair and replication, and protein synthesis and degradation."
53,AT4G34138,myc234_1h_rCol_rH_down,1h,Col under High R/FR,down,GO:0008152, UDP-glucosyl transferase 73B1 ,UGT73B1,metabolic process,"The chemical reactions and pathways, including anabolism and catabolism, by which living organisms transform chemical substances. Metabolic processes typically transform small molecules, but also include macromolecular processes such as DNA repair and replication, and protein synthesis and degradation."
54,AT1G22400,myc234_1h_rCol_rH_down,1h,Col under High R/FR,down,GO:0008152, UDP-Glycosyltransferase superfamily protein ,ATUGT85A1;UGT85A1,metabolic process,"The chemical reactions and pathways, including anabolism and catabolism, by which living organisms transform chemical substances. Metabolic processes typically transform small molecules, but also include macromolecular processes such as DNA repair and replication, and protein synthesis and degradation."
55,AT5G38040,myc234_1h_rCol_rH_down,1h,Col under High R/FR,down,GO:0008152, UDP-Glycosyltransferase superfamily protein ,NA,metabolic process,"The chemical reactions and pathways, including anabolism and catabolism, by which living organisms transform chemical substances. Metabolic processes typically transform small molecules, but also include macromolecular processes such as DNA repair and replication, and protein synthesis and degradation."
56,AT3G58990,myc234_1h_rCol_rH_down,1h,Col under High R/FR,down,GO:0009098, isopropylmalate isomerase 1 ,IPMI1,leucine biosynthetic process,"The chemical reactions and pathways resulting in the formation of leucine, 2-amino-4-methylpentanoic acid."
57,AT5G14200,myc234_1h_rCol_rH_down,1h,Col under High R/FR,down,GO:0009098, isopropylmalate dehydrogenase 1 ,ATIMD1;IMD1,leucine biosynthetic process,"The chemical reactions and pathways resulting in the formation of leucine, 2-amino-4-methylpentanoic acid."
58,AT2G43100,myc234_1h_rCol_rH_down,1h,Col under High R/FR,down,GO:0009098, isopropylmalate isomerase 2 ,ATLEUD1;IPMI2,leucine biosynthetic process,"The chemical reactions and pathways resulting in the formation of leucine, 2-amino-4-methylpentanoic acid."
59,AT5G23010,myc234_1h_rCol_rH_down,1h,Col under High R/FR,down,GO:0009098, methylthioalkylmalate synthase 1 ,GSM1;IMS3;MAM1,leucine biosynthetic process,"The chemical reactions and pathways resulting in the formation of leucine, 2-amino-4-methylpentanoic acid."
60,AT3G49680,myc234_1h_rCol_rH_down,1h,Col under High R/FR,down,GO:0009098, branched-chain aminotransferase 3 ,ATBCAT-3;BCAT3,leucine biosynthetic process,"The chemical reactions and pathways resulting in the formation of leucine, 2-amino-4-methylpentanoic acid."
61,AT3G22840,myc234_1h_rCol_rH_down,1h,Col under High R/FR,down,GO:0009409, Chlorophyll A-B binding family protein ,ELIP;ELIP1,response to cold,"Any process that results in a change in state or activity of a cell or an organism (in terms of movement, secretion, enzyme production, gene expression, etc.) as a result of a cold stimulus, a temperature stimulus below the optimal temperature for that organism."
62,AT5G20630,myc234_1h_rCol_rH_down,1h,Col under High R/FR,down,GO:0009409, germin 3 ,ATGER3;GER3;GLP3;GLP3A;GLP3B,response to cold,"Any process that results in a change in state or activity of a cell or an organism (in terms of movement, secretion, enzyme production, gene expression, etc.) as a result of a cold stimulus, a temperature stimulus below the optimal temperature for that organism."
63,AT5G15970,myc234_1h_rCol_rH_down,1h,Col under High R/FR,down,GO:0009409, stress-responsive protein (KIN2) / stress-induced protein (KIN2) / cold-responsive protein (COR6.6) / cold-regulated protein (COR6.6) ,AtCor6.6;COR6.6;KIN2,response to cold,"Any process that results in a change in state or activity of a cell or an organism (in terms of movement, secretion, enzyme production, gene expression, etc.) as a result of a cold stimulus, a temperature stimulus below the optimal temperature for that organism."
64,AT3G16470,myc234_1h_rCol_rH_down,1h,Col under High R/FR,down,GO:0009409, Mannose-binding lectin superfamily protein ,AtJAC1;JAL35;JR1,response to cold,"Any process that results in a change in state or activity of a cell or an organism (in terms of movement, secretion, enzyme production, gene expression, etc.) as a result of a cold stimulus, a temperature stimulus below the optimal temperature for that organism."
65,AT5G04590,myc234_1h_rCol_rH_down,1h,Col under High R/FR,down,GO:0009409, sulfite reductase ,SIR,response to cold,"Any process that results in a change in state or activity of a cell or an organism (in terms of movement, secretion, enzyme production, gene expression, etc.) as a result of a cold stimulus, a temperature stimulus below the optimal temperature for that organism."
66,AT5G63980,myc234_1h_rCol_rH_down,1h,Col under High R/FR,down,GO:0009409, Inositol monophosphatase family protein ,ALX8;AtFRY1;ATSAL1;FRY1;HOS2;RON1;SAL1;SUPO1,response to cold,"Any process that results in a change in state or activity of a cell or an organism (in terms of movement, secretion, enzyme production, gene expression, etc.) as a result of a cold stimulus, a temperature stimulus below the optimal temperature for that organism."
67,AT3G05880,myc234_1h_rCol_rH_down,1h,Col under High R/FR,down,GO:0009409, Low temperature and salt responsive protein family ,RCI2A,response to cold,"Any process that results in a change in state or activity of a cell or an organism (in terms of movement, secretion, enzyme production, gene expression, etc.) as a result of a cold stimulus, a temperature stimulus below the optimal temperature for that organism."
68,AT3G11170,myc234_1h_rCol_rH_down,1h,Col under High R/FR,down,GO:0009409, fatty acid desaturase 7 ,AtFAD7;FAD7;FADD,response to cold,"Any process that results in a change in state or activity of a cell or an organism (in terms of movement, secretion, enzyme production, gene expression, etc.) as a result of a cold stimulus, a temperature stimulus below the optimal temperature for that organism."
69,AT3G25770,myc234_1h_rCol_rH_down,1h,Col under High R/FR,down,GO:0009409, allene oxide cyclase 2 ,AOC2,response to cold,"Any process that results in a change in state or activity of a cell or an organism (in terms of movement, secretion, enzyme production, gene expression, etc.) as a result of a cold stimulus, a temperature stimulus below the optimal temperature for that organism."
70,AT4G37610,myc234_1h_rCol_rH_down,1h,Col under High R/FR,down,GO:0009409, BTB and TAZ domain protein 5 ,BT5,response to cold,"Any process that results in a change in state or activity of a cell or an organism (in terms of movement, secretion, enzyme production, gene expression, etc.) as a result of a cold stimulus, a temperature stimulus below the optimal temperature for that organism."
71,AT5G20250,myc234_1h_rCol_rH_down,1h,Col under High R/FR,down,GO:0009409, Raffinose synthase family protein ,DIN10;RS6,response to cold,"Any process that results in a change in state or activity of a cell or an organism (in terms of movement, secretion, enzyme production, gene expression, etc.) as a result of a cold stimulus, a temperature stimulus below the optimal temperature for that organism."
72,AT5G61030,myc234_1h_rCol_rH_down,1h,Col under High R/FR,down,GO:0009409, glycine-rich RNA-binding protein 3 ,GR-RBP3;ORRM3;RBGA7,response to cold,"Any process that results in a change in state or activity of a cell or an organism (in terms of movement, secretion, enzyme production, gene expression, etc.) as a result of a cold stimulus, a temperature stimulus below the optimal temperature for that organism."
73,AT1G22770,myc234_1h_rCol_rH_down,1h,Col under High R/FR,down,GO:0009409, gigantea protein (GI) ,FB;GI,response to cold,"Any process that results in a change in state or activity of a cell or an organism (in terms of movement, secretion, enzyme production, gene expression, etc.) as a result of a cold stimulus, a temperature stimulus below the optimal temperature for that organism."
74,AT5G08620,myc234_1h_rCol_rH_down,1h,Col under High R/FR,down,GO:0009409, DEA(D/H)-box RNA helicase family protein ,ATRH25;STRS2,response to cold,"Any process that results in a change in state or activity of a cell or an organism (in terms of movement, secretion, enzyme production, gene expression, etc.) as a result of a cold stimulus, a temperature stimulus below the optimal temperature for that organism."
75,AT1G20450,myc234_1h_rCol_rH_down,1h,Col under High R/FR,down,GO:0009409, Dehydrin family protein ,ERD10;LTI29;LTI45,response to cold,"Any process that results in a change in state or activity of a cell or an organism (in terms of movement, secretion, enzyme production, gene expression, etc.) as a result of a cold stimulus, a temperature stimulus below the optimal temperature for that organism."
76,AT3G53460,myc234_1h_rCol_rH_down,1h,Col under High R/FR,down,GO:0009409, chloroplast RNA-binding protein 29 ,CP29,response to cold,"Any process that results in a change in state or activity of a cell or an organism (in terms of movement, secretion, enzyme production, gene expression, etc.) as a result of a cold stimulus, a temperature stimulus below the optimal temperature for that organism."
77,AT4G30650,myc234_1h_rCol_rH_down,1h,Col under High R/FR,down,GO:0009409, Low temperature and salt responsive protein family ,NA,response to cold,"Any process that results in a change in state or activity of a cell or an organism (in terms of movement, secretion, enzyme production, gene expression, etc.) as a result of a cold stimulus, a temperature stimulus below the optimal temperature for that organism."
78,AT3G19710,myc234_1h_rCol_rH_down,1h,Col under High R/FR,down,GO:0009611, branched-chain aminotransferase4 ,BCAT4,response to wounding,"Any process that results in a change in state or activity of a cell or an organism (in terms of movement, secretion, enzyme production, gene expression, etc.) as a result of a stimulus indicating damage to the organism."
79,AT4G12030,myc234_1h_rCol_rH_down,1h,Col under High R/FR,down,GO:0009611, bile acid transporter 5 ,BASS5;BAT5,response to wounding,"Any process that results in a change in state or activity of a cell or an organism (in terms of movement, secretion, enzyme production, gene expression, etc.) as a result of a stimulus indicating damage to the organism."
80,AT2G22330,myc234_1h_rCol_rH_down,1h,Col under High R/FR,down,GO:0009611," cytochrome P450, family 79, subfamily B, polypeptide 3 ",CYP79B3,response to wounding,"Any process that results in a change in state or activity of a cell or an organism (in terms of movement, secretion, enzyme production, gene expression, etc.) as a result of a stimulus indicating damage to the organism."
81,AT1G52030,myc234_1h_rCol_rH_down,1h,Col under High R/FR,down,GO:0009611, myrosinase-binding protein 2 ,F-ATMBP;MBP1.2;MBP2,response to wounding,"Any process that results in a change in state or activity of a cell or an organism (in terms of movement, secretion, enzyme production, gene expression, etc.) as a result of a stimulus indicating damage to the organism."
82,AT5G07700,myc234_1h_rCol_rH_down,1h,Col under High R/FR,down,GO:0009611, myb domain protein 76 ,AtMYB76;MYB76,response to wounding,"Any process that results in a change in state or activity of a cell or an organism (in terms of movement, secretion, enzyme production, gene expression, etc.) as a result of a stimulus indicating damage to the organism."
83,AT2G06050,myc234_1h_rCol_rH_down,1h,Col under High R/FR,down,GO:0009611, oxophytodienoate-reductase 3 ,AtOPR3;DDE1;OPR3,response to wounding,"Any process that results in a change in state or activity of a cell or an organism (in terms of movement, secretion, enzyme production, gene expression, etc.) as a result of a stimulus indicating damage to the organism."
84,AT4G21670,myc234_1h_rCol_rH_down,1h,Col under High R/FR,down,GO:0009611, C-terminal domain phosphatase-like 1 ,ATCPL1;CPL1;FRY2;RCF2;SHI4,response to wounding,"Any process that results in a change in state or activity of a cell or an organism (in terms of movement, secretion, enzyme production, gene expression, etc.) as a result of a stimulus indicating damage to the organism."
85,AT3G16470,myc234_1h_rCol_rH_down,1h,Col under High R/FR,down,GO:0009611, Mannose-binding lectin superfamily protein ,AtJAC1;JAL35;JR1,response to wounding,"Any process that results in a change in state or activity of a cell or an organism (in terms of movement, secretion, enzyme production, gene expression, etc.) as a result of a stimulus indicating damage to the organism."
86,AT5G43580,myc234_1h_rCol_rH_down,1h,Col under High R/FR,down,GO:0009611," Serine protease inhibitor, potato inhibitor I-type family protein ",UPI,response to wounding,"Any process that results in a change in state or activity of a cell or an organism (in terms of movement, secretion, enzyme production, gene expression, etc.) as a result of a stimulus indicating damage to the organism."
87,AT3G13790,myc234_1h_rCol_rH_down,1h,Col under High R/FR,down,GO:0009611, Glycosyl hydrolases family 32 protein ,ATBFRUCT1;AtCWI1;ATCWINV1;CWI1,response to wounding,"Any process that results in a change in state or activity of a cell or an organism (in terms of movement, secretion, enzyme production, gene expression, etc.) as a result of a stimulus indicating damage to the organism."
88,AT1G66760,myc234_1h_rCol_rH_down,1h,Col under High R/FR,down,GO:0009611, MATE efflux family protein ,NA,response to wounding,"Any process that results in a change in state or activity of a cell or an organism (in terms of movement, secretion, enzyme production, gene expression, etc.) as a result of a stimulus indicating damage to the organism."
89,AT3G45140,myc234_1h_rCol_rH_down,1h,Col under High R/FR,down,GO:0009611, lipoxygenase 2 ,ATLOX2;LOX2,response to wounding,"Any process that results in a change in state or activity of a cell or an organism (in terms of movement, secretion, enzyme production, gene expression, etc.) as a result of a stimulus indicating damage to the organism."
90,AT1G16410,myc234_1h_rCol_rH_down,1h,Col under High R/FR,down,GO:0009625, cytochrome p450 79f1 ,BUS1;CYP79F1;SPS1,response to insect,"Any process that results in a change in state or activity of a cell or an organism (in terms of movement, secretion, enzyme production, gene expression, etc.) as a result of a stimulus from an insect."
91,AT4G13770,myc234_1h_rCol_rH_down,1h,Col under High R/FR,down,GO:0009625," cytochrome P450, family 83, subfamily A, polypeptide 1 ",CYP83A1;REF2,response to insect,"Any process that results in a change in state or activity of a cell or an organism (in terms of movement, secretion, enzyme production, gene expression, etc.) as a result of a stimulus from an insect."
92,AT2G22330,myc234_1h_rCol_rH_down,1h,Col under High R/FR,down,GO:0009625," cytochrome P450, family 79, subfamily B, polypeptide 3 ",CYP79B3,response to insect,"Any process that results in a change in state or activity of a cell or an organism (in terms of movement, secretion, enzyme production, gene expression, etc.) as a result of a stimulus from an insect."
93,AT5G23010,myc234_1h_rCol_rH_down,1h,Col under High R/FR,down,GO:0009625, methylthioalkylmalate synthase 1 ,GSM1;IMS3;MAM1,response to insect,"Any process that results in a change in state or activity of a cell or an organism (in terms of movement, secretion, enzyme production, gene expression, etc.) as a result of a stimulus from an insect."
94,AT4G39950,myc234_1h_rCol_rH_down,1h,Col under High R/FR,down,GO:0009625," cytochrome P450, family 79, subfamily B, polypeptide 2 ",CYP79B2,response to insect,"Any process that results in a change in state or activity of a cell or an organism (in terms of movement, secretion, enzyme production, gene expression, etc.) as a result of a stimulus from an insect."
95,AT5G07700,myc234_1h_rCol_rH_down,1h,Col under High R/FR,down,GO:0009625, myb domain protein 76 ,AtMYB76;MYB76,response to insect,"Any process that results in a change in state or activity of a cell or an organism (in terms of movement, secretion, enzyme production, gene expression, etc.) as a result of a stimulus from an insect."
96,AT1G52400,myc234_1h_rCol_rH_down,1h,Col under High R/FR,down,GO:0009625, beta glucosidase 18 ,ATBG1;BGL1;BGLU18,response to insect,"Any process that results in a change in state or activity of a cell or an organism (in terms of movement, secretion, enzyme production, gene expression, etc.) as a result of a stimulus from an insect."
97,AT4G31500,myc234_1h_rCol_rH_down,1h,Col under High R/FR,down,GO:0009682," cytochrome P450, family 83, subfamily B, polypeptide 1 ",ATR4;CYP83B1;RED1;RNT1;SUR2,induced systemic resistance,A response to non-pathogenic bacteria that confers broad spectrum systemic resistance to disease that does not depend upon salicylic acid signaling.
98,AT2G22330,myc234_1h_rCol_rH_down,1h,Col under High R/FR,down,GO:0009682," cytochrome P450, family 79, subfamily B, polypeptide 3 ",CYP79B3,induced systemic resistance,A response to non-pathogenic bacteria that confers broad spectrum systemic resistance to disease that does not depend upon salicylic acid signaling.
99,AT4G39950,myc234_1h_rCol_rH_down,1h,Col under High R/FR,down,GO:0009682," cytochrome P450, family 79, subfamily B, polypeptide 2 ",CYP79B2,induced systemic resistance,A response to non-pathogenic bacteria that confers broad spectrum systemic resistance to disease that does not depend upon salicylic acid signaling.
100,AT4G31500,myc234_1h_rCol_rH_down,1h,Col under High R/FR,down,GO:0009684," cytochrome P450, family 83, subfamily B, polypeptide 1 ",ATR4;CYP83B1;RED1;RNT1;SUR2,indoleacetic acid biosynthetic process,"The chemical reactions and pathways resulting in the formation of indole-3-acetic acid, a compound which functions as a growth regulator in plants."
101,AT2G22330,myc234_1h_rCol_rH_down,1h,Col under High R/FR,down,GO:0009684," cytochrome P450, family 79, subfamily B, polypeptide 3 ",CYP79B3,indoleacetic acid biosynthetic process,"The chemical reactions and pathways resulting in the formation of indole-3-acetic acid, a compound which functions as a growth regulator in plants."
102,AT4G39950,myc234_1h_rCol_rH_down,1h,Col under High R/FR,down,GO:0009684," cytochrome P450, family 79, subfamily B, polypeptide 2 ",CYP79B2,indoleacetic acid biosynthetic process,"The chemical reactions and pathways resulting in the formation of indole-3-acetic acid, a compound which functions as a growth regulator in plants."
103,AT2G20610,myc234_1h_rCol_rH_down,1h,Col under High R/FR,down,GO:0009684, Tyrosine transaminase family protein ,ALF1;HLS3;RTY;RTY1;SUR1,indoleacetic acid biosynthetic process,"The chemical reactions and pathways resulting in the formation of indole-3-acetic acid, a compound which functions as a growth regulator in plants."
104,AT5G54810,myc234_1h_rCol_rH_down,1h,Col under High R/FR,down,GO:0009684, tryptophan synthase beta-subunit 1 ,ATTSB1;TRP2;TRPB;TSB1,indoleacetic acid biosynthetic process,"The chemical reactions and pathways resulting in the formation of indole-3-acetic acid, a compound which functions as a growth regulator in plants."
105,AT4G17880,myc234_1h_rCol_rH_down,1h,Col under High R/FR,down,GO:0009718, Basic helix-loop-helix (bHLH) DNA-binding family protein ,MYC4,anthocyanin-containing compound biosynthetic process,"The chemical reactions and pathways resulting in the formation of anthocyanins, any member of a group of intensely colored soluble glycosides of anthocyanidins."
106,AT3G21560,myc234_1h_rCol_rH_down,1h,Col under High R/FR,down,GO:0009718, UDP-Glycosyltransferase superfamily protein ,BRT1;UGT84A2,anthocyanin-containing compound biosynthetic process,"The chemical reactions and pathways resulting in the formation of anthocyanins, any member of a group of intensely colored soluble glycosides of anthocyanidins."
107,AT1G56650,myc234_1h_rCol_rH_down,1h,Col under High R/FR,down,GO:0009718, production of anthocyanin pigment 1 ,ATMYB75;AtPAP1;MYB75;PAP1;SIAA1,anthocyanin-containing compound biosynthetic process,"The chemical reactions and pathways resulting in the formation of anthocyanins, any member of a group of intensely colored soluble glycosides of anthocyanidins."
108,AT3G29590,myc234_1h_rCol_rH_down,1h,Col under High R/FR,down,GO:0009718, HXXXD-type acyl-transferase family protein ,AT5MAT,anthocyanin-containing compound biosynthetic process,"The chemical reactions and pathways resulting in the formation of anthocyanins, any member of a group of intensely colored soluble glycosides of anthocyanidins."
109,AT2G22330,myc234_1h_rCol_rH_down,1h,Col under High R/FR,down,GO:0010112," cytochrome P450, family 79, subfamily B, polypeptide 3 ",CYP79B3,regulation of systemic acquired resistance,"Any process that modulates the frequency, rate or extent of systemic acquired resistance."
110,AT1G09415,myc234_1h_rCol_rH_down,1h,Col under High R/FR,down,GO:0010112, NIM1-interacting 3 ,NIMIN-3,regulation of systemic acquired resistance,"Any process that modulates the frequency, rate or extent of systemic acquired resistance."
111,AT1G44350,myc234_1h_rCol_rH_down,1h,Col under High R/FR,down,GO:0010112, IAA-leucine resistant (ILR)-like gene 6 ,ILL6,regulation of systemic acquired resistance,"Any process that modulates the frequency, rate or extent of systemic acquired resistance."
112,AT5G13320,myc234_1h_rCol_rH_down,1h,Col under High R/FR,down,GO:0010112, Auxin-responsive GH3 family protein ,AtGH3.12;GDG1;GH3.12;PBS3;WIN3,regulation of systemic acquired resistance,"Any process that modulates the frequency, rate or extent of systemic acquired resistance."
113,AT4G39940,myc234_1h_rCol_rH_down,1h,Col under High R/FR,down,GO:0010439, APS-kinase 2 ,AKN2;APK2,regulation of glucosinolate biosynthetic process,"Any process that modulates the frequency, rate or extent of the chemical reactions and pathways resulting in the formation of glucosinolates, substituted thioglucosides found in rapeseed products and related cruciferae."
114,AT2G25450,myc234_1h_rCol_rH_down,1h,Col under High R/FR,down,GO:0010439, 2-oxoglutarate (2OG) and Fe(II)-dependent oxygenase superfamily protein ,NA,regulation of glucosinolate biosynthetic process,"Any process that modulates the frequency, rate or extent of the chemical reactions and pathways resulting in the formation of glucosinolates, substituted thioglucosides found in rapeseed products and related cruciferae."
115,AT2G14750,myc234_1h_rCol_rH_down,1h,Col under High R/FR,down,GO:0010439, APS kinase ,AKN1;APK;APK1;ATAKN1,regulation of glucosinolate biosynthetic process,"Any process that modulates the frequency, rate or extent of the chemical reactions and pathways resulting in the formation of glucosinolates, substituted thioglucosides found in rapeseed products and related cruciferae."
116,AT5G07700,myc234_1h_rCol_rH_down,1h,Col under High R/FR,down,GO:0010439, myb domain protein 76 ,AtMYB76;MYB76,regulation of glucosinolate biosynthetic process,"Any process that modulates the frequency, rate or extent of the chemical reactions and pathways resulting in the formation of glucosinolates, substituted thioglucosides found in rapeseed products and related cruciferae."
117,AT1G04770,myc234_1h_rCol_rH_down,1h,Col under High R/FR,down,GO:0010439, Tetratricopeptide repeat (TPR)-like superfamily protein ,SD!2,regulation of glucosinolate biosynthetic process,"Any process that modulates the frequency, rate or extent of the chemical reactions and pathways resulting in the formation of glucosinolates, substituted thioglucosides found in rapeseed products and related cruciferae."
118,AT1G03410,myc234_1h_rCol_rH_down,1h,Col under High R/FR,down,GO:0010439, 2-oxoglutarate (2OG) and Fe(II)-dependent oxygenase superfamily protein ,2A6,regulation of glucosinolate biosynthetic process,"Any process that modulates the frequency, rate or extent of the chemical reactions and pathways resulting in the formation of glucosinolates, substituted thioglucosides found in rapeseed products and related cruciferae."
119,AT4G04610,myc234_1h_rCol_rH_down,1h,Col under High R/FR,down,GO:0019419, APS reductase 1 ,APR;APR1;ATAPR1;PRH19,sulfate reduction,"The chemical reactions and pathways resulting in the reduction of sulfate to another sulfur-containing ion or compound such as hydrogen sulfide, adenosine-phosphosulfate (APS) or thiosulfate."
120,AT4G21990,myc234_1h_rCol_rH_down,1h,Col under High R/FR,down,GO:0019419, APS reductase 3 ,APR3;ATAPR3;PRH-26;PRH26,sulfate reduction,"The chemical reactions and pathways resulting in the reduction of sulfate to another sulfur-containing ion or compound such as hydrogen sulfide, adenosine-phosphosulfate (APS) or thiosulfate."
121,AT5G04590,myc234_1h_rCol_rH_down,1h,Col under High R/FR,down,GO:0019419, sulfite reductase ,SIR,sulfate reduction,"The chemical reactions and pathways resulting in the reduction of sulfate to another sulfur-containing ion or compound such as hydrogen sulfide, adenosine-phosphosulfate (APS) or thiosulfate."
122,AT1G16410,myc234_1h_rCol_rH_down,1h,Col under High R/FR,down,GO:0019761, cytochrome p450 79f1 ,BUS1;CYP79F1;SPS1,glucosinolate biosynthetic process,"The chemical reactions and pathways resulting in the formation of glucosinolates, substituted thioglucosides found in rapeseed products and related cruciferae."
123,AT3G19710,myc234_1h_rCol_rH_down,1h,Col under High R/FR,down,GO:0019761, branched-chain aminotransferase4 ,BCAT4,glucosinolate biosynthetic process,"The chemical reactions and pathways resulting in the formation of glucosinolates, substituted thioglucosides found in rapeseed products and related cruciferae."
124,AT3G58990,myc234_1h_rCol_rH_down,1h,Col under High R/FR,down,GO:0019761, isopropylmalate isomerase 1 ,IPMI1,glucosinolate biosynthetic process,"The chemical reactions and pathways resulting in the formation of glucosinolates, substituted thioglucosides found in rapeseed products and related cruciferae."
125,AT5G14200,myc234_1h_rCol_rH_down,1h,Col under High R/FR,down,GO:0019761, isopropylmalate dehydrogenase 1 ,ATIMD1;IMD1,glucosinolate biosynthetic process,"The chemical reactions and pathways resulting in the formation of glucosinolates, substituted thioglucosides found in rapeseed products and related cruciferae."
126,AT2G43100,myc234_1h_rCol_rH_down,1h,Col under High R/FR,down,GO:0019761, isopropylmalate isomerase 2 ,ATLEUD1;IPMI2,glucosinolate biosynthetic process,"The chemical reactions and pathways resulting in the formation of glucosinolates, substituted thioglucosides found in rapeseed products and related cruciferae."
127,AT1G24100,myc234_1h_rCol_rH_down,1h,Col under High R/FR,down,GO:0019761, UDP-glucosyl transferase 74B1 ,UGT74B1,glucosinolate biosynthetic process,"The chemical reactions and pathways resulting in the formation of glucosinolates, substituted thioglucosides found in rapeseed products and related cruciferae."
128,AT2G25450,myc234_1h_rCol_rH_down,1h,Col under High R/FR,down,GO:0019761, 2-oxoglutarate (2OG) and Fe(II)-dependent oxygenase superfamily protein ,NA,glucosinolate biosynthetic process,"The chemical reactions and pathways resulting in the formation of glucosinolates, substituted thioglucosides found in rapeseed products and related cruciferae."
129,AT4G13770,myc234_1h_rCol_rH_down,1h,Col under High R/FR,down,GO:0019761," cytochrome P450, family 83, subfamily A, polypeptide 1 ",CYP83A1;REF2,glucosinolate biosynthetic process,"The chemical reactions and pathways resulting in the formation of glucosinolates, substituted thioglucosides found in rapeseed products and related cruciferae."
130,AT1G18590,myc234_1h_rCol_rH_down,1h,Col under High R/FR,down,GO:0019761, sulfotransferase 17 ,ATSOT17;ATST5C;SOT17,glucosinolate biosynthetic process,"The chemical reactions and pathways resulting in the formation of glucosinolates, substituted thioglucosides found in rapeseed products and related cruciferae."
131,AT1G74090,myc234_1h_rCol_rH_down,1h,Col under High R/FR,down,GO:0019761, desulfo-glucosinolate sulfotransferase 18 ,ATSOT18;ATST5B;SOT18,glucosinolate biosynthetic process,"The chemical reactions and pathways resulting in the formation of glucosinolates, substituted thioglucosides found in rapeseed products and related cruciferae."
132,AT1G62560,myc234_1h_rCol_rH_down,1h,Col under High R/FR,down,GO:0019761, flavin-monooxygenase glucosinolate S-oxygenase 3 ,FMO GS-OX3,glucosinolate biosynthetic process,"The chemical reactions and pathways resulting in the formation of glucosinolates, substituted thioglucosides found in rapeseed products and related cruciferae."
133,AT4G12030,myc234_1h_rCol_rH_down,1h,Col under High R/FR,down,GO:0019761, bile acid transporter 5 ,BASS5;BAT5,glucosinolate biosynthetic process,"The chemical reactions and pathways resulting in the formation of glucosinolates, substituted thioglucosides found in rapeseed products and related cruciferae."
134,AT1G74100,myc234_1h_rCol_rH_down,1h,Col under High R/FR,down,GO:0019761, sulfotransferase 16 ,ATSOT16;ATST5A;CORI-7;SOT16,glucosinolate biosynthetic process,"The chemical reactions and pathways resulting in the formation of glucosinolates, substituted thioglucosides found in rapeseed products and related cruciferae."
135,AT2G22330,myc234_1h_rCol_rH_down,1h,Col under High R/FR,down,GO:0019761," cytochrome P450, family 79, subfamily B, polypeptide 3 ",CYP79B3,glucosinolate biosynthetic process,"The chemical reactions and pathways resulting in the formation of glucosinolates, substituted thioglucosides found in rapeseed products and related cruciferae."
136,AT5G23010,myc234_1h_rCol_rH_down,1h,Col under High R/FR,down,GO:0019761, methylthioalkylmalate synthase 1 ,GSM1;IMS3;MAM1,glucosinolate biosynthetic process,"The chemical reactions and pathways resulting in the formation of glucosinolates, substituted thioglucosides found in rapeseed products and related cruciferae."
137,AT2G20610,myc234_1h_rCol_rH_down,1h,Col under High R/FR,down,GO:0019761, Tyrosine transaminase family protein ,ALF1;HLS3;RTY;RTY1;SUR1,glucosinolate biosynthetic process,"The chemical reactions and pathways resulting in the formation of glucosinolates, substituted thioglucosides found in rapeseed products and related cruciferae."
138,AT1G03410,myc234_1h_rCol_rH_down,1h,Col under High R/FR,down,GO:0019761, 2-oxoglutarate (2OG) and Fe(II)-dependent oxygenase superfamily protein ,2A6,glucosinolate biosynthetic process,"The chemical reactions and pathways resulting in the formation of glucosinolates, substituted thioglucosides found in rapeseed products and related cruciferae."
139,AT1G16400,myc234_1h_rCol_rH_down,1h,Col under High R/FR,down,GO:0019761," cytochrome P450, family 79, subfamily F, polypeptide 2 ",CYP79F2,glucosinolate biosynthetic process,"The chemical reactions and pathways resulting in the formation of glucosinolates, substituted thioglucosides found in rapeseed products and related cruciferae."
140,AT2G43530,myc234_1h_rCol_rH_down,1h,Col under High R/FR,down,GO:0050832, Scorpion toxin-like knottin superfamily protein ,NA,defense response to fungus,Reactions triggered in response to the presence of a fungus that act to protect the cell or organism.
141,AT1G52410,myc234_1h_rCol_rH_down,1h,Col under High R/FR,down,GO:0050832, TSK-associating protein 1 ,AtTSA1;TSA1,defense response to fungus,Reactions triggered in response to the presence of a fungus that act to protect the cell or organism.
142,AT1G11580,myc234_1h_rCol_rH_down,1h,Col under High R/FR,down,GO:0050832, methylesterase PCR A ,ATPMEPCRA;PMEPCRA,defense response to fungus,Reactions triggered in response to the presence of a fungus that act to protect the cell or organism.
143,AT5G43580,myc234_1h_rCol_rH_down,1h,Col under High R/FR,down,GO:0050832," Serine protease inhibitor, potato inhibitor I-type family protein ",UPI,defense response to fungus,Reactions triggered in response to the presence of a fungus that act to protect the cell or organism.
144,AT1G19670,myc234_1h_rCol_rH_down,1h,Col under High R/FR,down,GO:0050832, chlorophyllase 1 ,ATCLH1;ATHCOR1;CLH1;CORI1,defense response to fungus,Reactions triggered in response to the presence of a fungus that act to protect the cell or organism.
145,AT2G43550,myc234_1h_rCol_rH_down,1h,Col under High R/FR,down,GO:0050832, Scorpion toxin-like knottin superfamily protein ,NA,defense response to fungus,Reactions triggered in response to the presence of a fungus that act to protect the cell or organism.
146,AT3G05730,myc234_1h_rCol_rH_down,1h,Col under High R/FR,down,GO:0050832, Encodes a defensin-like (DEFL) family protein. ,NA,defense response to fungus,Reactions triggered in response to the presence of a fungus that act to protect the cell or organism.
147,AT1G56650,myc234_1h_rCol_rH_down,1h,Col under High R/FR,down,GO:0050832, production of anthocyanin pigment 1 ,ATMYB75;AtPAP1;MYB75;PAP1;SIAA1,defense response to fungus,Reactions triggered in response to the presence of a fungus that act to protect the cell or organism.
148,AT3G13790,myc234_1h_rCol_rH_down,1h,Col under High R/FR,down,GO:0050832, Glycosyl hydrolases family 32 protein ,ATBFRUCT1;AtCWI1;ATCWINV1;CWI1,defense response to fungus,Reactions triggered in response to the presence of a fungus that act to protect the cell or organism.
149,AT3G23820,myc234_1h_rCol_rH_down,1h,Col under High R/FR,down,GO:0050832, UDP-D-glucuronate 4-epimerase 6 ,GAE6,defense response to fungus,Reactions triggered in response to the presence of a fungus that act to protect the cell or organism.
150,AT4G30650,myc234_1h_rCol_rH_down,1h,Col under High R/FR,down,GO:0050832, Low temperature and salt responsive protein family ,NA,defense response to fungus,Reactions triggered in response to the presence of a fungus that act to protect the cell or organism.
151,AT1G52400,myc234_1h_rCol_rH_down,1h,Col under High R/FR,down,GO:0050832, beta glucosidase 18 ,ATBG1;BGL1;BGLU18,defense response to fungus,Reactions triggered in response to the presence of a fungus that act to protect the cell or organism.
152,AT4G31500,myc234_1h_rCol_rH_down,1h,Col under High R/FR,down,GO:0052544," cytochrome P450, family 83, subfamily B, polypeptide 1 ",ATR4;CYP83B1;RED1;RNT1;SUR2,defense response by callose deposition in cell wall,"Any process in which callose is transported to, and/or maintained in, the cell wall during the defense response. Callose is a linear 1,3-beta-d-glucan formed from UDP-glucose and is found in certain plant cell walls."
153,AT1G24100,myc234_1h_rCol_rH_down,1h,Col under High R/FR,down,GO:0052544, UDP-glucosyl transferase 74B1 ,UGT74B1,defense response by callose deposition in cell wall,"Any process in which callose is transported to, and/or maintained in, the cell wall during the defense response. Callose is a linear 1,3-beta-d-glucan formed from UDP-glucose and is found in certain plant cell walls."
154,AT2G22330,myc234_1h_rCol_rH_down,1h,Col under High R/FR,down,GO:0052544," cytochrome P450, family 79, subfamily B, polypeptide 3 ",CYP79B3,defense response by callose deposition in cell wall,"Any process in which callose is transported to, and/or maintained in, the cell wall during the defense response. Callose is a linear 1,3-beta-d-glucan formed from UDP-glucose and is found in certain plant cell walls."
155,AT4G39950,myc234_1h_rCol_rH_down,1h,Col under High R/FR,down,GO:0052544," cytochrome P450, family 79, subfamily B, polypeptide 2 ",CYP79B2,defense response by callose deposition in cell wall,"Any process in which callose is transported to, and/or maintained in, the cell wall during the defense response. Callose is a linear 1,3-beta-d-glucan formed from UDP-glucose and is found in certain plant cell walls."
156,AT4G31500,myc234_1h_rCol_rH_down,1h,Col under High R/FR,down,GO:0055114," cytochrome P450, family 83, subfamily B, polypeptide 1 ",ATR4;CYP83B1;RED1;RNT1;SUR2,oxidation-reduction process,"A metabolic process that results in the removal or addition of one or more electrons to or from a substance, with or without the concomitant removal or addition of a proton or protons."
157,AT1G16410,myc234_1h_rCol_rH_down,1h,Col under High R/FR,down,GO:0055114, cytochrome p450 79f1 ,BUS1;CYP79F1;SPS1,oxidation-reduction process,"A metabolic process that results in the removal or addition of one or more electrons to or from a substance, with or without the concomitant removal or addition of a proton or protons."
158,AT2G30860,myc234_1h_rCol_rH_down,1h,Col under High R/FR,down,GO:0055114, glutathione S-transferase PHI 9 ,ATGSTF7;ATGSTF9;GLUTTR;GSTF9,oxidation-reduction process,"A metabolic process that results in the removal or addition of one or more electrons to or from a substance, with or without the concomitant removal or addition of a proton or protons."
159,AT2G25450,myc234_1h_rCol_rH_down,1h,Col under High R/FR,down,GO:0055114, 2-oxoglutarate (2OG) and Fe(II)-dependent oxygenase superfamily protein ,NA,oxidation-reduction process,"A metabolic process that results in the removal or addition of one or more electrons to or from a substance, with or without the concomitant removal or addition of a proton or protons."
160,AT4G13770,myc234_1h_rCol_rH_down,1h,Col under High R/FR,down,GO:0055114," cytochrome P450, family 83, subfamily A, polypeptide 1 ",CYP83A1;REF2,oxidation-reduction process,"A metabolic process that results in the removal or addition of one or more electrons to or from a substance, with or without the concomitant removal or addition of a proton or protons."
161,AT4G04610,myc234_1h_rCol_rH_down,1h,Col under High R/FR,down,GO:0055114, APS reductase 1 ,APR;APR1;ATAPR1;PRH19,oxidation-reduction process,"A metabolic process that results in the removal or addition of one or more electrons to or from a substance, with or without the concomitant removal or addition of a proton or protons."
162,AT1G62560,myc234_1h_rCol_rH_down,1h,Col under High R/FR,down,GO:0055114, flavin-monooxygenase glucosinolate S-oxygenase 3 ,FMO GS-OX3,oxidation-reduction process,"A metabolic process that results in the removal or addition of one or more electrons to or from a substance, with or without the concomitant removal or addition of a proton or protons."
163,AT2G22330,myc234_1h_rCol_rH_down,1h,Col under High R/FR,down,GO:0055114," cytochrome P450, family 79, subfamily B, polypeptide 3 ",CYP79B3,oxidation-reduction process,"A metabolic process that results in the removal or addition of one or more electrons to or from a substance, with or without the concomitant removal or addition of a proton or protons."
164,AT4G39950,myc234_1h_rCol_rH_down,1h,Col under High R/FR,down,GO:0055114," cytochrome P450, family 79, subfamily B, polypeptide 2 ",CYP79B2,oxidation-reduction process,"A metabolic process that results in the removal or addition of one or more electrons to or from a substance, with or without the concomitant removal or addition of a proton or protons."
165,AT1G65860,myc234_1h_rCol_rH_down,1h,Col under High R/FR,down,GO:0055114, flavin-monooxygenase glucosinolate S-oxygenase 1 ,FMO GS-OX1,oxidation-reduction process,"A metabolic process that results in the removal or addition of one or more electrons to or from a substance, with or without the concomitant removal or addition of a proton or protons."
166,AT5G54190,myc234_1h_rCol_rH_down,1h,Col under High R/FR,down,GO:0055114, protochlorophyllide oxidoreductase A ,PORA,oxidation-reduction process,"A metabolic process that results in the removal or addition of one or more electrons to or from a substance, with or without the concomitant removal or addition of a proton or protons."
167,AT5G42250,myc234_1h_rCol_rH_down,1h,Col under High R/FR,down,GO:0055114, Zinc-binding alcohol dehydrogenase family protein ,NA,oxidation-reduction process,"A metabolic process that results in the removal or addition of one or more electrons to or from a substance, with or without the concomitant removal or addition of a proton or protons."
168,AT5G07460,myc234_1h_rCol_rH_down,1h,Col under High R/FR,down,GO:0055114, peptidemethionine sulfoxide reductase 2 ,ATMSRA2;PMSR2,oxidation-reduction process,"A metabolic process that results in the removal or addition of one or more electrons to or from a substance, with or without the concomitant removal or addition of a proton or protons."
169,AT2G06050,myc234_1h_rCol_rH_down,1h,Col under High R/FR,down,GO:0055114, oxophytodienoate-reductase 3 ,AtOPR3;DDE1;OPR3,oxidation-reduction process,"A metabolic process that results in the removal or addition of one or more electrons to or from a substance, with or without the concomitant removal or addition of a proton or protons."
170,AT4G04830,myc234_1h_rCol_rH_down,1h,Col under High R/FR,down,GO:0055114, methionine sulfoxide reductase B5 ,ATMSRB5;MSRB5,oxidation-reduction process,"A metabolic process that results in the removal or addition of one or more electrons to or from a substance, with or without the concomitant removal or addition of a proton or protons."
171,AT4G37410,myc234_1h_rCol_rH_down,1h,Col under High R/FR,down,GO:0055114," cytochrome P450, family 81, subfamily F, polypeptide 4 ",CYP81F4,oxidation-reduction process,"A metabolic process that results in the removal or addition of one or more electrons to or from a substance, with or without the concomitant removal or addition of a proton or protons."
172,AT4G12310,myc234_1h_rCol_rH_down,1h,Col under High R/FR,down,GO:0055114," cytochrome P450, family 706, subfamily A, polypeptide 5 ",CYP706A5,oxidation-reduction process,"A metabolic process that results in the removal or addition of one or more electrons to or from a substance, with or without the concomitant removal or addition of a proton or protons."
173,AT2G34060,myc234_1h_rCol_rH_down,1h,Col under High R/FR,down,GO:0055114, Peroxidase superfamily protein ,NA,oxidation-reduction process,"A metabolic process that results in the removal or addition of one or more electrons to or from a substance, with or without the concomitant removal or addition of a proton or protons."
174,AT2G32440,myc234_1h_rCol_rH_down,1h,Col under High R/FR,down,GO:0055114, ent-kaurenoic acid hydroxylase 2 ,ATKAO2;CYP88A4;KAO2,oxidation-reduction process,"A metabolic process that results in the removal or addition of one or more electrons to or from a substance, with or without the concomitant removal or addition of a proton or protons."
175,AT4G21990,myc234_1h_rCol_rH_down,1h,Col under High R/FR,down,GO:0055114, APS reductase 3 ,APR3;ATAPR3;PRH-26;PRH26,oxidation-reduction process,"A metabolic process that results in the removal or addition of one or more electrons to or from a substance, with or without the concomitant removal or addition of a proton or protons."
176,AT5G04590,myc234_1h_rCol_rH_down,1h,Col under High R/FR,down,GO:0055114, sulfite reductase ,SIR,oxidation-reduction process,"A metabolic process that results in the removal or addition of one or more electrons to or from a substance, with or without the concomitant removal or addition of a proton or protons."
177,AT2G22170,myc234_1h_rCol_rH_down,1h,Col under High R/FR,down,GO:0055114," Lipase/lipooxygenase, PLAT/LH2 family protein ",PLAT2,oxidation-reduction process,"A metabolic process that results in the removal or addition of one or more electrons to or from a substance, with or without the concomitant removal or addition of a proton or protons."
178,AT4G20860,myc234_1h_rCol_rH_down,1h,Col under High R/FR,down,GO:0055114, FAD-binding Berberine family protein ,AtBBE22;BBE22,oxidation-reduction process,"A metabolic process that results in the removal or addition of one or more electrons to or from a substance, with or without the concomitant removal or addition of a proton or protons."
179,AT3G11170,myc234_1h_rCol_rH_down,1h,Col under High R/FR,down,GO:0055114, fatty acid desaturase 7 ,AtFAD7;FAD7;FADD,oxidation-reduction process,"A metabolic process that results in the removal or addition of one or more electrons to or from a substance, with or without the concomitant removal or addition of a proton or protons."
180,AT1G16400,myc234_1h_rCol_rH_down,1h,Col under High R/FR,down,GO:0055114," cytochrome P450, family 79, subfamily F, polypeptide 2 ",CYP79F2,oxidation-reduction process,"A metabolic process that results in the removal or addition of one or more electrons to or from a substance, with or without the concomitant removal or addition of a proton or protons."
181,AT3G45140,myc234_1h_rCol_rH_down,1h,Col under High R/FR,down,GO:0055114, lipoxygenase 2 ,ATLOX2;LOX2,oxidation-reduction process,"A metabolic process that results in the removal or addition of one or more electrons to or from a substance, with or without the concomitant removal or addition of a proton or protons."
182,AT4G19380,myc234_1h_rCol_rH_down,1h,Col under High R/FR,down,GO:0055114, Long-chain fatty alcohol dehydrogenase family protein ,NA,oxidation-reduction process,"A metabolic process that results in the removal or addition of one or more electrons to or from a substance, with or without the concomitant removal or addition of a proton or protons."
183,AT1G43560,myc234_1h_rCol_rH_down,1h,Col under High R/FR,down,GO:0055114, thioredoxin Y2 ,Aty2;ty2,oxidation-reduction process,"A metabolic process that results in the removal or addition of one or more electrons to or from a substance, with or without the concomitant removal or addition of a proton or protons."
184,AT5G51100,myc234_1h_rCol_rH_down,1h,Col under High R/FR,down,GO:0055114, Fe superoxide dismutase 2 ,FSD2,oxidation-reduction process,"A metabolic process that results in the removal or addition of one or more electrons to or from a substance, with or without the concomitant removal or addition of a proton or protons."
185,AT5G38430,myc234_1h_rCol_rH_down,1h,Col under High R/FR,down,GO:0055114, Ribulose bisphosphate carboxylase (small chain) family protein ,RBCS1B,oxidation-reduction process,"A metabolic process that results in the removal or addition of one or more electrons to or from a substance, with or without the concomitant removal or addition of a proton or protons."
186,AT4G39940,myc234_1h_rCol_rH_down,1h,Col under High R/FR,down,GO:0070814, APS-kinase 2 ,AKN2;APK2,hydrogen sulfide biosynthetic process,"The chemical reactions and pathways resulting in the formation of hydrogen sulfide, H2S."
187,AT2G14750,myc234_1h_rCol_rH_down,1h,Col under High R/FR,down,GO:0070814, APS kinase ,AKN1;APK;APK1;ATAKN1,hydrogen sulfide biosynthetic process,"The chemical reactions and pathways resulting in the formation of hydrogen sulfide, H2S."
188,AT4G14680,myc234_1h_rCol_rH_down,1h,Col under High R/FR,down,GO:0070814, Pseudouridine synthase/archaeosine transglycosylase-like family protein ,APS3;ATPS3,hydrogen sulfide biosynthetic process,"The chemical reactions and pathways resulting in the formation of hydrogen sulfide, H2S."
189,AT3G22890,myc234_1h_rCol_rH_down,1h,Col under High R/FR,down,GO:0070814, ATP sulfurylase 1 ,APS1;ATPS1,hydrogen sulfide biosynthetic process,"The chemical reactions and pathways resulting in the formation of hydrogen sulfide, H2S."
190,AT3G22840,myc234_1h_rCol_rH_down,1h,Col under High R/FR,down,GO:0080167, Chlorophyll A-B binding family protein ,ELIP;ELIP1,response to karrikin,"Any process that results in a change in state or activity of a cell or an organism (in terms of movement, secretion, enzyme production, gene expression, etc.) as a result of a karrikin stimulus. Karrikins are signaling molecules in smoke from burning vegetation that trigger seed germination for many angiosperms (flowering plants)."
191,AT5G07460,myc234_1h_rCol_rH_down,1h,Col under High R/FR,down,GO:0080167, peptidemethionine sulfoxide reductase 2 ,ATMSRA2;PMSR2,response to karrikin,"Any process that results in a change in state or activity of a cell or an organism (in terms of movement, secretion, enzyme production, gene expression, etc.) as a result of a karrikin stimulus. Karrikins are signaling molecules in smoke from burning vegetation that trigger seed germination for many angiosperms (flowering plants)."
192,AT1G25275,myc234_1h_rCol_rH_down,1h,Col under High R/FR,down,GO:0080167, unknown protein; FUNCTIONS IN: molecular_function unknown; INVOLVED IN: response to karrikin; LOCATED IN: endomembrane system; EXPRESSED IN: 23 plant structures; EXPRESSED DURING: 13 growth stages; Has 35333 Blast hits to 34131 proteins in 2444 species: Archae - 798; Bacteria - 22429; Metazoa - 974; Fungi - 991; Plants - 531; Viruses - 0; Other Eukaryotes - 9610 (source: NCBI BLink). ,NA,response to karrikin,"Any process that results in a change in state or activity of a cell or an organism (in terms of movement, secretion, enzyme production, gene expression, etc.) as a result of a karrikin stimulus. Karrikins are signaling molecules in smoke from burning vegetation that trigger seed germination for many angiosperms (flowering plants)."
193,AT3G21560,myc234_1h_rCol_rH_down,1h,Col under High R/FR,down,GO:0080167, UDP-Glycosyltransferase superfamily protein ,BRT1;UGT84A2,response to karrikin,"Any process that results in a change in state or activity of a cell or an organism (in terms of movement, secretion, enzyme production, gene expression, etc.) as a result of a karrikin stimulus. Karrikins are signaling molecules in smoke from burning vegetation that trigger seed germination for many angiosperms (flowering plants)."
194,AT2G36080,myc234_1h_rCol_rH_down,1h,Col under High R/FR,down,GO:0080167, AP2/B3-like transcriptional factor family protein ,ABS2;NGAL1,response to karrikin,"Any process that results in a change in state or activity of a cell or an organism (in terms of movement, secretion, enzyme production, gene expression, etc.) as a result of a karrikin stimulus. Karrikins are signaling molecules in smoke from burning vegetation that trigger seed germination for many angiosperms (flowering plants)."
195,AT3G13790,myc234_1h_rCol_rH_down,1h,Col under High R/FR,down,GO:0080167, Glycosyl hydrolases family 32 protein ,ATBFRUCT1;AtCWI1;ATCWINV1;CWI1,response to karrikin,"Any process that results in a change in state or activity of a cell or an organism (in terms of movement, secretion, enzyme production, gene expression, etc.) as a result of a karrikin stimulus. Karrikins are signaling molecules in smoke from burning vegetation that trigger seed germination for many angiosperms (flowering plants)."
196,AT5G63810,myc234_1h_rCol_rH_down,1h,Col under High R/FR,down,GO:0080167, beta-galactosidase 10 ,AtBGAL10;BGAL10,response to karrikin,"Any process that results in a change in state or activity of a cell or an organism (in terms of movement, secretion, enzyme production, gene expression, etc.) as a result of a karrikin stimulus. Karrikins are signaling molecules in smoke from burning vegetation that trigger seed germination for many angiosperms (flowering plants)."
197,AT1G70420,myc234_1h_rCol_rH_down,1h,Col under High R/FR,down,GO:0080167, Protein of unknown function (DUF1645) ,NA,response to karrikin,"Any process that results in a change in state or activity of a cell or an organism (in terms of movement, secretion, enzyme production, gene expression, etc.) as a result of a karrikin stimulus. Karrikins are signaling molecules in smoke from burning vegetation that trigger seed germination for many angiosperms (flowering plants)."
198,AT5G20250,myc234_1h_rCol_rH_down,1h,Col under High R/FR,down,GO:0080167, Raffinose synthase family protein ,DIN10;RS6,response to karrikin,"Any process that results in a change in state or activity of a cell or an organism (in terms of movement, secretion, enzyme production, gene expression, etc.) as a result of a karrikin stimulus. Karrikins are signaling molecules in smoke from burning vegetation that trigger seed germination for many angiosperms (flowering plants)."
199,AT1G22770,myc234_1h_rCol_rH_down,1h,Col under High R/FR,down,GO:0080167, gigantea protein (GI) ,FB;GI,response to karrikin,"Any process that results in a change in state or activity of a cell or an organism (in terms of movement, secretion, enzyme production, gene expression, etc.) as a result of a karrikin stimulus. Karrikins are signaling molecules in smoke from burning vegetation that trigger seed germination for many angiosperms (flowering plants)."
200,AT2G45660,myc234_1h_rCol_rH_up,1h,Col under High R/FR,up,GO:0010077, AGAMOUS-like 20 ,AGL20;ATSOC1;SOC1,maintenance of inflorescence meristem identity,"The process in which an organism retains a population of inflorescence meristem cells, preventing the commitment of all stem cell progeny to a differentiated cell fate."
201,AT5G60910,myc234_1h_rCol_rH_up,1h,Col under High R/FR,up,GO:0010077, AGAMOUS-like 8 ,AGL8;FUL,maintenance of inflorescence meristem identity,"The process in which an organism retains a population of inflorescence meristem cells, preventing the commitment of all stem cell progeny to a differentiated cell fate."
202,AT5G61850,myc234_1h_rCol_rH_up,1h,Col under High R/FR,up,GO:0010077, floral meristem identity control protein LEAFY (LFY) ,LFY;LFY3,maintenance of inflorescence meristem identity,"The process in which an organism retains a population of inflorescence meristem cells, preventing the commitment of all stem cell progeny to a differentiated cell fate."
203,AT4G24540,myc234_1h_rCol_rH_up,1h,Col under High R/FR,up,GO:0010077, AGAMOUS-like 24 ,AGL24,maintenance of inflorescence meristem identity,"The process in which an organism retains a population of inflorescence meristem cells, preventing the commitment of all stem cell progeny to a differentiated cell fate."
204,AT1G18710,myc234_1h_rCol_rH_up,1h,Col under High R/FR,up,GO:0030154, myb domain protein 47 ,AtMYB47;MYB47,cell differentiation,"The process in which relatively unspecialized cells, e.g. embryonic or regenerative cells, acquire specialized structural and/or functional features that characterize the cells, tissues, or organs of the mature organism or some other relatively stable phase of the organism's life history. Differentiation includes the processes involved in commitment of a cell to a specific fate and its subsequent development to the mature state."
205,AT2G45660,myc234_1h_rCol_rH_up,1h,Col under High R/FR,up,GO:0030154, AGAMOUS-like 20 ,AGL20;ATSOC1;SOC1,cell differentiation,"The process in which relatively unspecialized cells, e.g. embryonic or regenerative cells, acquire specialized structural and/or functional features that characterize the cells, tissues, or organs of the mature organism or some other relatively stable phase of the organism's life history. Differentiation includes the processes involved in commitment of a cell to a specific fate and its subsequent development to the mature state."
206,AT5G61420,myc234_1h_rCol_rH_up,1h,Col under High R/FR,up,GO:0030154, myb domain protein 28 ,AtMYB28;HAG1;MYB28;PMG1,cell differentiation,"The process in which relatively unspecialized cells, e.g. embryonic or regenerative cells, acquire specialized structural and/or functional features that characterize the cells, tissues, or organs of the mature organism or some other relatively stable phase of the organism's life history. Differentiation includes the processes involved in commitment of a cell to a specific fate and its subsequent development to the mature state."
207,AT5G60890,myc234_1h_rCol_rH_up,1h,Col under High R/FR,up,GO:0030154, myb domain protein 34 ,AtATR1;ATMYB34;ATR1;MYB34,cell differentiation,"The process in which relatively unspecialized cells, e.g. embryonic or regenerative cells, acquire specialized structural and/or functional features that characterize the cells, tissues, or organs of the mature organism or some other relatively stable phase of the organism's life history. Differentiation includes the processes involved in commitment of a cell to a specific fate and its subsequent development to the mature state."
208,AT1G69120,myc234_1h_rCol_rH_up,1h,Col under High R/FR,up,GO:0030154, K-box region and MADS-box transcription factor family protein  ,AGL7;AP1;AtAP1,cell differentiation,"The process in which relatively unspecialized cells, e.g. embryonic or regenerative cells, acquire specialized structural and/or functional features that characterize the cells, tissues, or organs of the mature organism or some other relatively stable phase of the organism's life history. Differentiation includes the processes involved in commitment of a cell to a specific fate and its subsequent development to the mature state."
209,AT5G60910,myc234_1h_rCol_rH_up,1h,Col under High R/FR,up,GO:0030154, AGAMOUS-like 8 ,AGL8;FUL,cell differentiation,"The process in which relatively unspecialized cells, e.g. embryonic or regenerative cells, acquire specialized structural and/or functional features that characterize the cells, tissues, or organs of the mature organism or some other relatively stable phase of the organism's life history. Differentiation includes the processes involved in commitment of a cell to a specific fate and its subsequent development to the mature state."
210,AT5G61850,myc234_1h_rCol_rH_up,1h,Col under High R/FR,up,GO:0030154, floral meristem identity control protein LEAFY (LFY) ,LFY;LFY3,cell differentiation,"The process in which relatively unspecialized cells, e.g. embryonic or regenerative cells, acquire specialized structural and/or functional features that characterize the cells, tissues, or organs of the mature organism or some other relatively stable phase of the organism's life history. Differentiation includes the processes involved in commitment of a cell to a specific fate and its subsequent development to the mature state."
211,AT4G24540,myc234_1h_rCol_rH_up,1h,Col under High R/FR,up,GO:0030154, AGAMOUS-like 24 ,AGL24,cell differentiation,"The process in which relatively unspecialized cells, e.g. embryonic or regenerative cells, acquire specialized structural and/or functional features that characterize the cells, tissues, or organs of the mature organism or some other relatively stable phase of the organism's life history. Differentiation includes the processes involved in commitment of a cell to a specific fate and its subsequent development to the mature state."
212,AT3G12810,myc234_1h_rCol_rH_up,1h,Col under High R/FR,up,GO:0030154, SNF2 domain-containing protein / helicase domain-containing protein ,chr13;PIE1;SRCAP,cell differentiation,"The process in which relatively unspecialized cells, e.g. embryonic or regenerative cells, acquire specialized structural and/or functional features that characterize the cells, tissues, or organs of the mature organism or some other relatively stable phase of the organism's life history. Differentiation includes the processes involved in commitment of a cell to a specific fate and its subsequent development to the mature state."
213,AT4G39940,myc234_49h_rCol_rH_down,49h,Col under High R/FR,down,GO:0000103, APS-kinase 2 ,AKN2;APK2,sulfate assimilation,The pathways by which inorganic sulfate is processed and incorporated into sulfated compounds.
214,AT2G14750,myc234_49h_rCol_rH_down,49h,Col under High R/FR,down,GO:0000103, APS kinase ,AKN1;APK;APK1;ATAKN1,sulfate assimilation,The pathways by which inorganic sulfate is processed and incorporated into sulfated compounds.
215,AT4G04610,myc234_49h_rCol_rH_down,49h,Col under High R/FR,down,GO:0000103, APS reductase 1 ,APR;APR1;ATAPR1;PRH19,sulfate assimilation,The pathways by which inorganic sulfate is processed and incorporated into sulfated compounds.
216,AT4G14680,myc234_49h_rCol_rH_down,49h,Col under High R/FR,down,GO:0000103, Pseudouridine synthase/archaeosine transglycosylase-like family protein ,APS3;ATPS3,sulfate assimilation,The pathways by which inorganic sulfate is processed and incorporated into sulfated compounds.
217,AT3G22890,myc234_49h_rCol_rH_down,49h,Col under High R/FR,down,GO:0000103, ATP sulfurylase 1 ,APS1;ATPS1,sulfate assimilation,The pathways by which inorganic sulfate is processed and incorporated into sulfated compounds.
218,AT4G21990,myc234_49h_rCol_rH_down,49h,Col under High R/FR,down,GO:0000103, APS reductase 3 ,APR3;ATAPR3;PRH-26;PRH26,sulfate assimilation,The pathways by which inorganic sulfate is processed and incorporated into sulfated compounds.
219,AT4G31500,myc234_49h_rCol_rH_down,49h,Col under High R/FR,down,GO:0000162," cytochrome P450, family 83, subfamily B, polypeptide 1 ",ATR4;CYP83B1;RED1;RNT1;SUR2,tryptophan biosynthetic process,"The chemical reactions and pathways resulting in the formation of tryptophan, the chiral amino acid 2-amino-3-(1H-indol-3-yl)propanoic acid; tryptophan is synthesized from chorismate via anthranilate."
220,AT5G05730,myc234_49h_rCol_rH_down,49h,Col under High R/FR,down,GO:0000162, anthranilate synthase alpha subunit 1 ,AMT1;ASA1;JDL1;TRP5;WEI2,tryptophan biosynthetic process,"The chemical reactions and pathways resulting in the formation of tryptophan, the chiral amino acid 2-amino-3-(1H-indol-3-yl)propanoic acid; tryptophan is synthesized from chorismate via anthranilate."
221,AT5G54810,myc234_49h_rCol_rH_down,49h,Col under High R/FR,down,GO:0000162, tryptophan synthase beta-subunit 1 ,ATTSB1;TRP2;TRPB;TSB1,tryptophan biosynthetic process,"The chemical reactions and pathways resulting in the formation of tryptophan, the chiral amino acid 2-amino-3-(1H-indol-3-yl)propanoic acid; tryptophan is synthesized from chorismate via anthranilate."
222,AT1G25220,myc234_49h_rCol_rH_down,49h,Col under High R/FR,down,GO:0000162, anthranilate synthase beta subunit 1 ,ASB1;TRP4;WEI7,tryptophan biosynthetic process,"The chemical reactions and pathways resulting in the formation of tryptophan, the chiral amino acid 2-amino-3-(1H-indol-3-yl)propanoic acid; tryptophan is synthesized from chorismate via anthranilate."
223,AT2G04400,myc234_49h_rCol_rH_down,49h,Col under High R/FR,down,GO:0000162, Aldolase-type TIM barrel family protein ,IGPS,tryptophan biosynthetic process,"The chemical reactions and pathways resulting in the formation of tryptophan, the chiral amino acid 2-amino-3-(1H-indol-3-yl)propanoic acid; tryptophan is synthesized from chorismate via anthranilate."
224,AT3G54640,myc234_49h_rCol_rH_down,49h,Col under High R/FR,down,GO:0000162, tryptophan synthase alpha chain ,TRP3;TSA1,tryptophan biosynthetic process,"The chemical reactions and pathways resulting in the formation of tryptophan, the chiral amino acid 2-amino-3-(1H-indol-3-yl)propanoic acid; tryptophan is synthesized from chorismate via anthranilate."
225,AT5G48220,myc234_49h_rCol_rH_down,49h,Col under High R/FR,down,GO:0000162, Aldolase-type TIM barrel family protein ,NA,tryptophan biosynthetic process,"The chemical reactions and pathways resulting in the formation of tryptophan, the chiral amino acid 2-amino-3-(1H-indol-3-yl)propanoic acid; tryptophan is synthesized from chorismate via anthranilate."
226,AT5G24470,myc234_49h_rCol_rH_down,49h,Col under High R/FR,down,GO:0007623, pseudo-response regulator 5 ,APRR5;PRR5,circadian rhythm,Any biological process in an organism that recurs with a regularity of approximately 24 hours.
227,AT5G12050,myc234_49h_rCol_rH_down,49h,Col under High R/FR,down,GO:0007623, unknown protein; BEST Arabidopsis thaliana protein match is: unknown protein (TAIR:AT3G13980.1); Has 1807 Blast hits to 1807 proteins in 277 species: Archae - 0; Bacteria - 0; Metazoa - 736; Fungi - 347; Plants - 385; Viruses - 0; Other Eukaryotes - 339 (source: NCBI BLink). ,BG1,circadian rhythm,Any biological process in an organism that recurs with a regularity of approximately 24 hours.
228,AT1G68050,myc234_49h_rCol_rH_down,49h,Col under High R/FR,down,GO:0007623," flavin-binding, kelch repeat, f box 1 ",ADO3;FKF1,circadian rhythm,Any biological process in an organism that recurs with a regularity of approximately 24 hours.
229,AT5G60100,myc234_49h_rCol_rH_down,49h,Col under High R/FR,down,GO:0007623, pseudo-response regulator 3 ,APRR3;PRR3,circadian rhythm,Any biological process in an organism that recurs with a regularity of approximately 24 hours.
230,AT5G59570,myc234_49h_rCol_rH_down,49h,Col under High R/FR,down,GO:0007623, Homeodomain-like superfamily protein ,BOA,circadian rhythm,Any biological process in an organism that recurs with a regularity of approximately 24 hours.
231,AT3G04910,myc234_49h_rCol_rH_down,49h,Col under High R/FR,down,GO:0007623, with no lysine (K) kinase 1 ,ATWNK1;WNK1;ZIK4,circadian rhythm,Any biological process in an organism that recurs with a regularity of approximately 24 hours.
232,AT1G22770,myc234_49h_rCol_rH_down,49h,Col under High R/FR,down,GO:0007623, gigantea protein (GI) ,FB;GI,circadian rhythm,Any biological process in an organism that recurs with a regularity of approximately 24 hours.
233,AT5G61380,myc234_49h_rCol_rH_down,49h,Col under High R/FR,down,GO:0007623, CCT motif -containing response regulator protein ,APRR1;AtTOC1;PRR1;TOC1,circadian rhythm,Any biological process in an organism that recurs with a regularity of approximately 24 hours.
234,AT3G58850,myc234_49h_rCol_rH_down,49h,Col under High R/FR,down,GO:0007623, phy rapidly regulated 2 ,HLH2;PAR2,circadian rhythm,Any biological process in an organism that recurs with a regularity of approximately 24 hours.
235,AT3G45780,myc234_49h_rCol_rH_down,49h,Col under High R/FR,down,GO:0007623, phototropin 1 ,JK224;NPH1;PHOT1;RPT1,circadian rhythm,Any biological process in an organism that recurs with a regularity of approximately 24 hours.
236,AT3G26740,myc234_49h_rCol_rH_down,49h,Col under High R/FR,down,GO:0007623, CCR-like ,CCL,circadian rhythm,Any biological process in an organism that recurs with a regularity of approximately 24 hours.
237,AT2G43100,myc234_49h_rCol_rH_down,49h,Col under High R/FR,down,GO:0009098, isopropylmalate isomerase 2 ,ATLEUD1;IPMI2,leucine biosynthetic process,"The chemical reactions and pathways resulting in the formation of leucine, 2-amino-4-methylpentanoic acid."
238,AT5G23010,myc234_49h_rCol_rH_down,49h,Col under High R/FR,down,GO:0009098, methylthioalkylmalate synthase 1 ,GSM1;IMS3;MAM1,leucine biosynthetic process,"The chemical reactions and pathways resulting in the formation of leucine, 2-amino-4-methylpentanoic acid."
239,AT5G14200,myc234_49h_rCol_rH_down,49h,Col under High R/FR,down,GO:0009098, isopropylmalate dehydrogenase 1 ,ATIMD1;IMD1,leucine biosynthetic process,"The chemical reactions and pathways resulting in the formation of leucine, 2-amino-4-methylpentanoic acid."
240,AT3G58990,myc234_49h_rCol_rH_down,49h,Col under High R/FR,down,GO:0009098, isopropylmalate isomerase 1 ,IPMI1,leucine biosynthetic process,"The chemical reactions and pathways resulting in the formation of leucine, 2-amino-4-methylpentanoic acid."
241,AT3G49680,myc234_49h_rCol_rH_down,49h,Col under High R/FR,down,GO:0009098, branched-chain aminotransferase 3 ,ATBCAT-3;BCAT3,leucine biosynthetic process,"The chemical reactions and pathways resulting in the formation of leucine, 2-amino-4-methylpentanoic acid."
242,AT4G13430,myc234_49h_rCol_rH_down,49h,Col under High R/FR,down,GO:0009098, isopropyl malate isomerase large subunit 1 ,ATLEUC1;IIL1,leucine biosynthetic process,"The chemical reactions and pathways resulting in the formation of leucine, 2-amino-4-methylpentanoic acid."
243,AT1G74040,myc234_49h_rCol_rH_down,49h,Col under High R/FR,down,GO:0009098, 2-isopropylmalate synthase 1 ,IMS1;IPMS2;MAML-3,leucine biosynthetic process,"The chemical reactions and pathways resulting in the formation of leucine, 2-amino-4-methylpentanoic acid."
244,AT3G19710,myc234_49h_rCol_rH_down,49h,Col under High R/FR,down,GO:0009611, branched-chain aminotransferase4 ,BCAT4,response to wounding,"Any process that results in a change in state or activity of a cell or an organism (in terms of movement, secretion, enzyme production, gene expression, etc.) as a result of a stimulus indicating damage to the organism."
245,AT4G12030,myc234_49h_rCol_rH_down,49h,Col under High R/FR,down,GO:0009611, bile acid transporter 5 ,BASS5;BAT5,response to wounding,"Any process that results in a change in state or activity of a cell or an organism (in terms of movement, secretion, enzyme production, gene expression, etc.) as a result of a stimulus indicating damage to the organism."
246,AT2G22330,myc234_49h_rCol_rH_down,49h,Col under High R/FR,down,GO:0009611," cytochrome P450, family 79, subfamily B, polypeptide 3 ",CYP79B3,response to wounding,"Any process that results in a change in state or activity of a cell or an organism (in terms of movement, secretion, enzyme production, gene expression, etc.) as a result of a stimulus indicating damage to the organism."
247,AT5G07700,myc234_49h_rCol_rH_down,49h,Col under High R/FR,down,GO:0009611, myb domain protein 76 ,AtMYB76;MYB76,response to wounding,"Any process that results in a change in state or activity of a cell or an organism (in terms of movement, secretion, enzyme production, gene expression, etc.) as a result of a stimulus indicating damage to the organism."
248,AT1G52030,myc234_49h_rCol_rH_down,49h,Col under High R/FR,down,GO:0009611, myrosinase-binding protein 2 ,F-ATMBP;MBP1.2;MBP2,response to wounding,"Any process that results in a change in state or activity of a cell or an organism (in terms of movement, secretion, enzyme production, gene expression, etc.) as a result of a stimulus indicating damage to the organism."
249,AT5G42650,myc234_49h_rCol_rH_down,49h,Col under High R/FR,down,GO:0009611, allene oxide synthase ,AOS;CYP74A;DDE2,response to wounding,"Any process that results in a change in state or activity of a cell or an organism (in terms of movement, secretion, enzyme production, gene expression, etc.) as a result of a stimulus indicating damage to the organism."
250,AT3G13790,myc234_49h_rCol_rH_down,49h,Col under High R/FR,down,GO:0009611, Glycosyl hydrolases family 32 protein ,ATBFRUCT1;AtCWI1;ATCWINV1;CWI1,response to wounding,"Any process that results in a change in state or activity of a cell or an organism (in terms of movement, secretion, enzyme production, gene expression, etc.) as a result of a stimulus indicating damage to the organism."
251,AT2G06050,myc234_49h_rCol_rH_down,49h,Col under High R/FR,down,GO:0009611, oxophytodienoate-reductase 3 ,AtOPR3;DDE1;OPR3,response to wounding,"Any process that results in a change in state or activity of a cell or an organism (in terms of movement, secretion, enzyme production, gene expression, etc.) as a result of a stimulus indicating damage to the organism."
252,AT5G05730,myc234_49h_rCol_rH_down,49h,Col under High R/FR,down,GO:0009611, anthranilate synthase alpha subunit 1 ,AMT1;ASA1;JDL1;TRP5;WEI2,response to wounding,"Any process that results in a change in state or activity of a cell or an organism (in terms of movement, secretion, enzyme production, gene expression, etc.) as a result of a stimulus indicating damage to the organism."
253,AT3G16470,myc234_49h_rCol_rH_down,49h,Col under High R/FR,down,GO:0009611, Mannose-binding lectin superfamily protein ,AtJAC1;JAL35;JR1,response to wounding,"Any process that results in a change in state or activity of a cell or an organism (in terms of movement, secretion, enzyme production, gene expression, etc.) as a result of a stimulus indicating damage to the organism."
254,AT2G38870,myc234_49h_rCol_rH_down,49h,Col under High R/FR,down,GO:0009611," Serine protease inhibitor, potato inhibitor I-type family protein ",NA,response to wounding,"Any process that results in a change in state or activity of a cell or an organism (in terms of movement, secretion, enzyme production, gene expression, etc.) as a result of a stimulus indicating damage to the organism."
255,AT1G20510,myc234_49h_rCol_rH_down,49h,Col under High R/FR,down,GO:0009611, OPC-8:0 CoA ligase1 ,OPCL1,response to wounding,"Any process that results in a change in state or activity of a cell or an organism (in terms of movement, secretion, enzyme production, gene expression, etc.) as a result of a stimulus indicating damage to the organism."
256,AT4G21670,myc234_49h_rCol_rH_down,49h,Col under High R/FR,down,GO:0009611, C-terminal domain phosphatase-like 1 ,ATCPL1;CPL1;FRY2;RCF2;SHI4,response to wounding,"Any process that results in a change in state or activity of a cell or an organism (in terms of movement, secretion, enzyme production, gene expression, etc.) as a result of a stimulus indicating damage to the organism."
257,AT4G24350,myc234_49h_rCol_rH_down,49h,Col under High R/FR,down,GO:0009611, Phosphorylase superfamily protein ,NA,response to wounding,"Any process that results in a change in state or activity of a cell or an organism (in terms of movement, secretion, enzyme production, gene expression, etc.) as a result of a stimulus indicating damage to the organism."
258,AT1G70700,myc234_49h_rCol_rH_down,49h,Col under High R/FR,down,GO:0009611, TIFY domain/Divergent CCT motif family protein ,JAZ9;TIFY7,response to wounding,"Any process that results in a change in state or activity of a cell or an organism (in terms of movement, secretion, enzyme production, gene expression, etc.) as a result of a stimulus indicating damage to the organism."
259,AT2G28900,myc234_49h_rCol_rH_down,49h,Col under High R/FR,down,GO:0009611, outer plastid envelope protein 16-1 ,ATOEP16-1;ATOEP16-L;OEP16;OEP16-1,response to wounding,"Any process that results in a change in state or activity of a cell or an organism (in terms of movement, secretion, enzyme production, gene expression, etc.) as a result of a stimulus indicating damage to the organism."
260,AT1G51400,myc234_49h_rCol_rH_down,49h,Col under High R/FR,down,GO:0009611, Photosystem II 5 kD protein ,NA,response to wounding,"Any process that results in a change in state or activity of a cell or an organism (in terms of movement, secretion, enzyme production, gene expression, etc.) as a result of a stimulus indicating damage to the organism."
261,AT1G17380,myc234_49h_rCol_rH_down,49h,Col under High R/FR,down,GO:0009611, jasmonate-zim-domain protein 5 ,JAZ5;TIFY11A,response to wounding,"Any process that results in a change in state or activity of a cell or an organism (in terms of movement, secretion, enzyme production, gene expression, etc.) as a result of a stimulus indicating damage to the organism."
262,AT3G51450,myc234_49h_rCol_rH_down,49h,Col under High R/FR,down,GO:0009611, Calcium-dependent phosphotriesterase superfamily protein ,NA,response to wounding,"Any process that results in a change in state or activity of a cell or an organism (in terms of movement, secretion, enzyme production, gene expression, etc.) as a result of a stimulus indicating damage to the organism."
263,AT1G01470,myc234_49h_rCol_rH_down,49h,Col under High R/FR,down,GO:0009611, Late embryogenesis abundant protein ,AtLEA14;LEA1;LEA14;LSR3,response to wounding,"Any process that results in a change in state or activity of a cell or an organism (in terms of movement, secretion, enzyme production, gene expression, etc.) as a result of a stimulus indicating damage to the organism."
264,AT5G24770,myc234_49h_rCol_rH_down,49h,Col under High R/FR,down,GO:0009611, vegetative storage protein 2 ,ATVSP2;VSP2,response to wounding,"Any process that results in a change in state or activity of a cell or an organism (in terms of movement, secretion, enzyme production, gene expression, etc.) as a result of a stimulus indicating damage to the organism."
265,AT1G32640,myc234_49h_rCol_rH_down,49h,Col under High R/FR,down,GO:0009611, Basic helix-loop-helix (bHLH) DNA-binding family protein ,ATMYC2;JAI1;JIN1;MYC2;RD22BP1;ZBF1,response to wounding,"Any process that results in a change in state or activity of a cell or an organism (in terms of movement, secretion, enzyme production, gene expression, etc.) as a result of a stimulus indicating damage to the organism."
266,AT1G66760,myc234_49h_rCol_rH_down,49h,Col under High R/FR,down,GO:0009611, MATE efflux family protein ,NA,response to wounding,"Any process that results in a change in state or activity of a cell or an organism (in terms of movement, secretion, enzyme production, gene expression, etc.) as a result of a stimulus indicating damage to the organism."
267,AT5G07690,myc234_49h_rCol_rH_down,49h,Col under High R/FR,down,GO:0009611, myb domain protein 29 ,ATMYB29;MYB29;PMG2;RAO7,response to wounding,"Any process that results in a change in state or activity of a cell or an organism (in terms of movement, secretion, enzyme production, gene expression, etc.) as a result of a stimulus indicating damage to the organism."
268,AT3G45140,myc234_49h_rCol_rH_down,49h,Col under High R/FR,down,GO:0009611, lipoxygenase 2 ,ATLOX2;LOX2,response to wounding,"Any process that results in a change in state or activity of a cell or an organism (in terms of movement, secretion, enzyme production, gene expression, etc.) as a result of a stimulus indicating damage to the organism."
269,AT1G16410,myc234_49h_rCol_rH_down,49h,Col under High R/FR,down,GO:0009625, cytochrome p450 79f1 ,BUS1;CYP79F1;SPS1,response to insect,"Any process that results in a change in state or activity of a cell or an organism (in terms of movement, secretion, enzyme production, gene expression, etc.) as a result of a stimulus from an insect."
270,AT5G23010,myc234_49h_rCol_rH_down,49h,Col under High R/FR,down,GO:0009625, methylthioalkylmalate synthase 1 ,GSM1;IMS3;MAM1,response to insect,"Any process that results in a change in state or activity of a cell or an organism (in terms of movement, secretion, enzyme production, gene expression, etc.) as a result of a stimulus from an insect."
271,AT4G13770,myc234_49h_rCol_rH_down,49h,Col under High R/FR,down,GO:0009625," cytochrome P450, family 83, subfamily A, polypeptide 1 ",CYP83A1;REF2,response to insect,"Any process that results in a change in state or activity of a cell or an organism (in terms of movement, secretion, enzyme production, gene expression, etc.) as a result of a stimulus from an insect."
272,AT4G39950,myc234_49h_rCol_rH_down,49h,Col under High R/FR,down,GO:0009625," cytochrome P450, family 79, subfamily B, polypeptide 2 ",CYP79B2,response to insect,"Any process that results in a change in state or activity of a cell or an organism (in terms of movement, secretion, enzyme production, gene expression, etc.) as a result of a stimulus from an insect."
273,AT2G22330,myc234_49h_rCol_rH_down,49h,Col under High R/FR,down,GO:0009625," cytochrome P450, family 79, subfamily B, polypeptide 3 ",CYP79B3,response to insect,"Any process that results in a change in state or activity of a cell or an organism (in terms of movement, secretion, enzyme production, gene expression, etc.) as a result of a stimulus from an insect."
274,AT5G07700,myc234_49h_rCol_rH_down,49h,Col under High R/FR,down,GO:0009625, myb domain protein 76 ,AtMYB76;MYB76,response to insect,"Any process that results in a change in state or activity of a cell or an organism (in terms of movement, secretion, enzyme production, gene expression, etc.) as a result of a stimulus from an insect."
275,AT1G52400,myc234_49h_rCol_rH_down,49h,Col under High R/FR,down,GO:0009625, beta glucosidase 18 ,ATBG1;BGL1;BGLU18,response to insect,"Any process that results in a change in state or activity of a cell or an organism (in terms of movement, secretion, enzyme production, gene expression, etc.) as a result of a stimulus from an insect."
276,AT5G24770,myc234_49h_rCol_rH_down,49h,Col under High R/FR,down,GO:0009625, vegetative storage protein 2 ,ATVSP2;VSP2,response to insect,"Any process that results in a change in state or activity of a cell or an organism (in terms of movement, secretion, enzyme production, gene expression, etc.) as a result of a stimulus from an insect."
277,AT5G07690,myc234_49h_rCol_rH_down,49h,Col under High R/FR,down,GO:0009625, myb domain protein 29 ,ATMYB29;MYB29;PMG2;RAO7,response to insect,"Any process that results in a change in state or activity of a cell or an organism (in terms of movement, secretion, enzyme production, gene expression, etc.) as a result of a stimulus from an insect."
278,AT4G31500,myc234_49h_rCol_rH_down,49h,Col under High R/FR,down,GO:0009682," cytochrome P450, family 83, subfamily B, polypeptide 1 ",ATR4;CYP83B1;RED1;RNT1;SUR2,induced systemic resistance,A response to non-pathogenic bacteria that confers broad spectrum systemic resistance to disease that does not depend upon salicylic acid signaling.
279,AT4G39950,myc234_49h_rCol_rH_down,49h,Col under High R/FR,down,GO:0009682," cytochrome P450, family 79, subfamily B, polypeptide 2 ",CYP79B2,induced systemic resistance,A response to non-pathogenic bacteria that confers broad spectrum systemic resistance to disease that does not depend upon salicylic acid signaling.
280,AT2G22330,myc234_49h_rCol_rH_down,49h,Col under High R/FR,down,GO:0009682," cytochrome P450, family 79, subfamily B, polypeptide 3 ",CYP79B3,induced systemic resistance,A response to non-pathogenic bacteria that confers broad spectrum systemic resistance to disease that does not depend upon salicylic acid signaling.
281,AT5G07690,myc234_49h_rCol_rH_down,49h,Col under High R/FR,down,GO:0009682, myb domain protein 29 ,ATMYB29;MYB29;PMG2;RAO7,induced systemic resistance,A response to non-pathogenic bacteria that confers broad spectrum systemic resistance to disease that does not depend upon salicylic acid signaling.
282,AT4G31500,myc234_49h_rCol_rH_down,49h,Col under High R/FR,down,GO:0009684," cytochrome P450, family 83, subfamily B, polypeptide 1 ",ATR4;CYP83B1;RED1;RNT1;SUR2,indoleacetic acid biosynthetic process,"The chemical reactions and pathways resulting in the formation of indole-3-acetic acid, a compound which functions as a growth regulator in plants."
283,AT2G20610,myc234_49h_rCol_rH_down,49h,Col under High R/FR,down,GO:0009684, Tyrosine transaminase family protein ,ALF1;HLS3;RTY;RTY1;SUR1,indoleacetic acid biosynthetic process,"The chemical reactions and pathways resulting in the formation of indole-3-acetic acid, a compound which functions as a growth regulator in plants."
284,AT4G39950,myc234_49h_rCol_rH_down,49h,Col under High R/FR,down,GO:0009684," cytochrome P450, family 79, subfamily B, polypeptide 2 ",CYP79B2,indoleacetic acid biosynthetic process,"The chemical reactions and pathways resulting in the formation of indole-3-acetic acid, a compound which functions as a growth regulator in plants."
285,AT2G22330,myc234_49h_rCol_rH_down,49h,Col under High R/FR,down,GO:0009684," cytochrome P450, family 79, subfamily B, polypeptide 3 ",CYP79B3,indoleacetic acid biosynthetic process,"The chemical reactions and pathways resulting in the formation of indole-3-acetic acid, a compound which functions as a growth regulator in plants."
286,AT5G54810,myc234_49h_rCol_rH_down,49h,Col under High R/FR,down,GO:0009684, tryptophan synthase beta-subunit 1 ,ATTSB1;TRP2;TRPB;TSB1,indoleacetic acid biosynthetic process,"The chemical reactions and pathways resulting in the formation of indole-3-acetic acid, a compound which functions as a growth regulator in plants."
287,AT3G25770,myc234_49h_rCol_rH_down,49h,Col under High R/FR,down,GO:0009695, allene oxide cyclase 2 ,AOC2,jasmonic acid biosynthetic process,"The chemical reactions and pathways resulting in the formation of jasmonic acid, a fatty acid derivative."
288,AT5G42650,myc234_49h_rCol_rH_down,49h,Col under High R/FR,down,GO:0009695, allene oxide synthase ,AOS;CYP74A;DDE2,jasmonic acid biosynthetic process,"The chemical reactions and pathways resulting in the formation of jasmonic acid, a fatty acid derivative."
289,AT2G06050,myc234_49h_rCol_rH_down,49h,Col under High R/FR,down,GO:0009695, oxophytodienoate-reductase 3 ,AtOPR3;DDE1;OPR3,jasmonic acid biosynthetic process,"The chemical reactions and pathways resulting in the formation of jasmonic acid, a fatty acid derivative."
290,AT1G20510,myc234_49h_rCol_rH_down,49h,Col under High R/FR,down,GO:0009695, OPC-8:0 CoA ligase1 ,OPCL1,jasmonic acid biosynthetic process,"The chemical reactions and pathways resulting in the formation of jasmonic acid, a fatty acid derivative."
291,AT3G25760,myc234_49h_rCol_rH_down,49h,Col under High R/FR,down,GO:0009695, allene oxide cyclase 1 ,AOC1;ERD12,jasmonic acid biosynthetic process,"The chemical reactions and pathways resulting in the formation of jasmonic acid, a fatty acid derivative."
292,AT3G45140,myc234_49h_rCol_rH_down,49h,Col under High R/FR,down,GO:0009695, lipoxygenase 2 ,ATLOX2;LOX2,jasmonic acid biosynthetic process,"The chemical reactions and pathways resulting in the formation of jasmonic acid, a fatty acid derivative."
293,AT4G12030,myc234_49h_rCol_rH_down,49h,Col under High R/FR,down,GO:0009753, bile acid transporter 5 ,BASS5;BAT5,response to jasmonic acid,"Any process that results in a change in state or activity of a cell or an organism (in terms of movement, secretion, enzyme production, gene expression, etc.) as a result of a jasmonic acid stimulus."
294,AT5G07700,myc234_49h_rCol_rH_down,49h,Col under High R/FR,down,GO:0009753, myb domain protein 76 ,AtMYB76;MYB76,response to jasmonic acid,"Any process that results in a change in state or activity of a cell or an organism (in terms of movement, secretion, enzyme production, gene expression, etc.) as a result of a jasmonic acid stimulus."
295,AT5G46760,myc234_49h_rCol_rH_down,49h,Col under High R/FR,down,GO:0009753, Basic helix-loop-helix (bHLH) DNA-binding family protein ,MYC3,response to jasmonic acid,"Any process that results in a change in state or activity of a cell or an organism (in terms of movement, secretion, enzyme production, gene expression, etc.) as a result of a jasmonic acid stimulus."
296,AT5G42650,myc234_49h_rCol_rH_down,49h,Col under High R/FR,down,GO:0009753, allene oxide synthase ,AOS;CYP74A;DDE2,response to jasmonic acid,"Any process that results in a change in state or activity of a cell or an organism (in terms of movement, secretion, enzyme production, gene expression, etc.) as a result of a jasmonic acid stimulus."
297,AT3G16470,myc234_49h_rCol_rH_down,49h,Col under High R/FR,down,GO:0009753, Mannose-binding lectin superfamily protein ,AtJAC1;JAL35;JR1,response to jasmonic acid,"Any process that results in a change in state or activity of a cell or an organism (in terms of movement, secretion, enzyme production, gene expression, etc.) as a result of a jasmonic acid stimulus."
298,AT5G24780,myc234_49h_rCol_rH_down,49h,Col under High R/FR,down,GO:0009753, vegetative storage protein 1 ,ATVSP1;VSP1,response to jasmonic acid,"Any process that results in a change in state or activity of a cell or an organism (in terms of movement, secretion, enzyme production, gene expression, etc.) as a result of a jasmonic acid stimulus."
299,AT1G70700,myc234_49h_rCol_rH_down,49h,Col under High R/FR,down,GO:0009753, TIFY domain/Divergent CCT motif family protein ,JAZ9;TIFY7,response to jasmonic acid,"Any process that results in a change in state or activity of a cell or an organism (in terms of movement, secretion, enzyme production, gene expression, etc.) as a result of a jasmonic acid stimulus."
300,AT2G28900,myc234_49h_rCol_rH_down,49h,Col under High R/FR,down,GO:0009753, outer plastid envelope protein 16-1 ,ATOEP16-1;ATOEP16-L;OEP16;OEP16-1,response to jasmonic acid,"Any process that results in a change in state or activity of a cell or an organism (in terms of movement, secretion, enzyme production, gene expression, etc.) as a result of a jasmonic acid stimulus."
301,AT1G17380,myc234_49h_rCol_rH_down,49h,Col under High R/FR,down,GO:0009753, jasmonate-zim-domain protein 5 ,JAZ5;TIFY11A,response to jasmonic acid,"Any process that results in a change in state or activity of a cell or an organism (in terms of movement, secretion, enzyme production, gene expression, etc.) as a result of a jasmonic acid stimulus."
302,AT1G56650,myc234_49h_rCol_rH_down,49h,Col under High R/FR,down,GO:0009753, production of anthocyanin pigment 1 ,ATMYB75;AtPAP1;MYB75;PAP1;SIAA1,response to jasmonic acid,"Any process that results in a change in state or activity of a cell or an organism (in terms of movement, secretion, enzyme production, gene expression, etc.) as a result of a jasmonic acid stimulus."
303,AT1G44350,myc234_49h_rCol_rH_down,49h,Col under High R/FR,down,GO:0009753, IAA-leucine resistant (ILR)-like gene 6 ,ILL6,response to jasmonic acid,"Any process that results in a change in state or activity of a cell or an organism (in terms of movement, secretion, enzyme production, gene expression, etc.) as a result of a jasmonic acid stimulus."
304,AT3G51450,myc234_49h_rCol_rH_down,49h,Col under High R/FR,down,GO:0009753, Calcium-dependent phosphotriesterase superfamily protein ,NA,response to jasmonic acid,"Any process that results in a change in state or activity of a cell or an organism (in terms of movement, secretion, enzyme production, gene expression, etc.) as a result of a jasmonic acid stimulus."
305,AT5G55120,myc234_49h_rCol_rH_down,49h,Col under High R/FR,down,GO:0009753, galactose-1-phosphate guanylyltransferase (GDP)s;GDP-D-glucose phosphorylases;quercetin 4'-O-glucosyltransferases ,VTC5,response to jasmonic acid,"Any process that results in a change in state or activity of a cell or an organism (in terms of movement, secretion, enzyme production, gene expression, etc.) as a result of a jasmonic acid stimulus."
306,AT5G24770,myc234_49h_rCol_rH_down,49h,Col under High R/FR,down,GO:0009753, vegetative storage protein 2 ,ATVSP2;VSP2,response to jasmonic acid,"Any process that results in a change in state or activity of a cell or an organism (in terms of movement, secretion, enzyme production, gene expression, etc.) as a result of a jasmonic acid stimulus."
307,AT1G32640,myc234_49h_rCol_rH_down,49h,Col under High R/FR,down,GO:0009753, Basic helix-loop-helix (bHLH) DNA-binding family protein ,ATMYC2;JAI1;JIN1;MYC2;RD22BP1;ZBF1,response to jasmonic acid,"Any process that results in a change in state or activity of a cell or an organism (in terms of movement, secretion, enzyme production, gene expression, etc.) as a result of a jasmonic acid stimulus."
308,AT5G07690,myc234_49h_rCol_rH_down,49h,Col under High R/FR,down,GO:0009753, myb domain protein 29 ,ATMYB29;MYB29;PMG2;RAO7,response to jasmonic acid,"Any process that results in a change in state or activity of a cell or an organism (in terms of movement, secretion, enzyme production, gene expression, etc.) as a result of a jasmonic acid stimulus."
309,AT3G45140,myc234_49h_rCol_rH_down,49h,Col under High R/FR,down,GO:0009753, lipoxygenase 2 ,ATLOX2;LOX2,response to jasmonic acid,"Any process that results in a change in state or activity of a cell or an organism (in terms of movement, secretion, enzyme production, gene expression, etc.) as a result of a jasmonic acid stimulus."
310,AT5G01500,myc234_49h_rCol_rH_down,49h,Col under High R/FR,down,GO:0010117, thylakoid ATP/ADP carrier ,TAAC,photoprotection,Protection mechanism used by plants under conditions of excess energy absorption as a consequence of the light reactions of photosynthesis.
311,AT3G47860,myc234_49h_rCol_rH_down,49h,Col under High R/FR,down,GO:0010117, chloroplastic lipocalin ,CHL;LCNP,photoprotection,Protection mechanism used by plants under conditions of excess energy absorption as a consequence of the light reactions of photosynthesis.
312,AT3G22840,myc234_49h_rCol_rH_down,49h,Col under High R/FR,down,GO:0010117, Chlorophyll A-B binding family protein ,ELIP;ELIP1,photoprotection,Protection mechanism used by plants under conditions of excess energy absorption as a consequence of the light reactions of photosynthesis.
313,AT4G14690,myc234_49h_rCol_rH_down,49h,Col under High R/FR,down,GO:0010117, Chlorophyll A-B binding family protein ,ELIP2,photoprotection,Protection mechanism used by plants under conditions of excess energy absorption as a consequence of the light reactions of photosynthesis.
314,AT2G25450,myc234_49h_rCol_rH_down,49h,Col under High R/FR,down,GO:0010439, 2-oxoglutarate (2OG) and Fe(II)-dependent oxygenase superfamily protein ,NA,regulation of glucosinolate biosynthetic process,"Any process that modulates the frequency, rate or extent of the chemical reactions and pathways resulting in the formation of glucosinolates, substituted thioglucosides found in rapeseed products and related cruciferae."
315,AT4G39940,myc234_49h_rCol_rH_down,49h,Col under High R/FR,down,GO:0010439, APS-kinase 2 ,AKN2;APK2,regulation of glucosinolate biosynthetic process,"Any process that modulates the frequency, rate or extent of the chemical reactions and pathways resulting in the formation of glucosinolates, substituted thioglucosides found in rapeseed products and related cruciferae."
316,AT2G14750,myc234_49h_rCol_rH_down,49h,Col under High R/FR,down,GO:0010439, APS kinase ,AKN1;APK;APK1;ATAKN1,regulation of glucosinolate biosynthetic process,"Any process that modulates the frequency, rate or extent of the chemical reactions and pathways resulting in the formation of glucosinolates, substituted thioglucosides found in rapeseed products and related cruciferae."
317,AT5G07700,myc234_49h_rCol_rH_down,49h,Col under High R/FR,down,GO:0010439, myb domain protein 76 ,AtMYB76;MYB76,regulation of glucosinolate biosynthetic process,"Any process that modulates the frequency, rate or extent of the chemical reactions and pathways resulting in the formation of glucosinolates, substituted thioglucosides found in rapeseed products and related cruciferae."
318,AT1G04770,myc234_49h_rCol_rH_down,49h,Col under High R/FR,down,GO:0010439, Tetratricopeptide repeat (TPR)-like superfamily protein ,SD!2,regulation of glucosinolate biosynthetic process,"Any process that modulates the frequency, rate or extent of the chemical reactions and pathways resulting in the formation of glucosinolates, substituted thioglucosides found in rapeseed products and related cruciferae."
319,AT5G59540,myc234_49h_rCol_rH_down,49h,Col under High R/FR,down,GO:0010439, 2-oxoglutarate (2OG) and Fe(II)-dependent oxygenase superfamily protein ,NA,regulation of glucosinolate biosynthetic process,"Any process that modulates the frequency, rate or extent of the chemical reactions and pathways resulting in the formation of glucosinolates, substituted thioglucosides found in rapeseed products and related cruciferae."
320,AT5G07690,myc234_49h_rCol_rH_down,49h,Col under High R/FR,down,GO:0010439, myb domain protein 29 ,ATMYB29;MYB29;PMG2;RAO7,regulation of glucosinolate biosynthetic process,"Any process that modulates the frequency, rate or extent of the chemical reactions and pathways resulting in the formation of glucosinolates, substituted thioglucosides found in rapeseed products and related cruciferae."
321,AT4G39940,myc234_49h_rCol_rH_down,49h,Col under High R/FR,down,GO:0019344, APS-kinase 2 ,AKN2;APK2,cysteine biosynthetic process,"The chemical reactions and pathways resulting in the formation of cysteine, 2-amino-3-mercaptopropanoic acid."
322,AT2G14750,myc234_49h_rCol_rH_down,49h,Col under High R/FR,down,GO:0019344, APS kinase ,AKN1;APK;APK1;ATAKN1,cysteine biosynthetic process,"The chemical reactions and pathways resulting in the formation of cysteine, 2-amino-3-mercaptopropanoic acid."
323,AT4G04610,myc234_49h_rCol_rH_down,49h,Col under High R/FR,down,GO:0019344, APS reductase 1 ,APR;APR1;ATAPR1;PRH19,cysteine biosynthetic process,"The chemical reactions and pathways resulting in the formation of cysteine, 2-amino-3-mercaptopropanoic acid."
324,AT4G21990,myc234_49h_rCol_rH_down,49h,Col under High R/FR,down,GO:0019344, APS reductase 3 ,APR3;ATAPR3;PRH-26;PRH26,cysteine biosynthetic process,"The chemical reactions and pathways resulting in the formation of cysteine, 2-amino-3-mercaptopropanoic acid."
325,AT3G03630,myc234_49h_rCol_rH_down,49h,Col under High R/FR,down,GO:0019344, cysteine synthase 26 ,CS26,cysteine biosynthetic process,"The chemical reactions and pathways resulting in the formation of cysteine, 2-amino-3-mercaptopropanoic acid."
326,AT5G28020,myc234_49h_rCol_rH_down,49h,Col under High R/FR,down,GO:0019344, cysteine synthase D2 ,ATCYSD2;CYSD2,cysteine biosynthetic process,"The chemical reactions and pathways resulting in the formation of cysteine, 2-amino-3-mercaptopropanoic acid."
327,AT4G14880,myc234_49h_rCol_rH_down,49h,Col under High R/FR,down,GO:0019344, O-acetylserine (thiol) lyase (OAS-TL) isoform A1 ,ATCYS-3A;CYTACS1;OASA1;OLD3,cysteine biosynthetic process,"The chemical reactions and pathways resulting in the formation of cysteine, 2-amino-3-mercaptopropanoic acid."
328,AT4G04610,myc234_49h_rCol_rH_down,49h,Col under High R/FR,down,GO:0019419, APS reductase 1 ,APR;APR1;ATAPR1;PRH19,sulfate reduction,"The chemical reactions and pathways resulting in the reduction of sulfate to another sulfur-containing ion or compound such as hydrogen sulfide, adenosine-phosphosulfate (APS) or thiosulfate."
329,AT4G21990,myc234_49h_rCol_rH_down,49h,Col under High R/FR,down,GO:0019419, APS reductase 3 ,APR3;ATAPR3;PRH-26;PRH26,sulfate reduction,"The chemical reactions and pathways resulting in the reduction of sulfate to another sulfur-containing ion or compound such as hydrogen sulfide, adenosine-phosphosulfate (APS) or thiosulfate."
330,AT5G04590,myc234_49h_rCol_rH_down,49h,Col under High R/FR,down,GO:0019419, sulfite reductase ,SIR,sulfate reduction,"The chemical reactions and pathways resulting in the reduction of sulfate to another sulfur-containing ion or compound such as hydrogen sulfide, adenosine-phosphosulfate (APS) or thiosulfate."
331,AT1G16410,myc234_49h_rCol_rH_down,49h,Col under High R/FR,down,GO:0019761, cytochrome p450 79f1 ,BUS1;CYP79F1;SPS1,glucosinolate biosynthetic process,"The chemical reactions and pathways resulting in the formation of glucosinolates, substituted thioglucosides found in rapeseed products and related cruciferae."
332,AT2G43100,myc234_49h_rCol_rH_down,49h,Col under High R/FR,down,GO:0019761, isopropylmalate isomerase 2 ,ATLEUD1;IPMI2,glucosinolate biosynthetic process,"The chemical reactions and pathways resulting in the formation of glucosinolates, substituted thioglucosides found in rapeseed products and related cruciferae."
333,AT5G23010,myc234_49h_rCol_rH_down,49h,Col under High R/FR,down,GO:0019761, methylthioalkylmalate synthase 1 ,GSM1;IMS3;MAM1,glucosinolate biosynthetic process,"The chemical reactions and pathways resulting in the formation of glucosinolates, substituted thioglucosides found in rapeseed products and related cruciferae."
334,AT3G19710,myc234_49h_rCol_rH_down,49h,Col under High R/FR,down,GO:0019761, branched-chain aminotransferase4 ,BCAT4,glucosinolate biosynthetic process,"The chemical reactions and pathways resulting in the formation of glucosinolates, substituted thioglucosides found in rapeseed products and related cruciferae."
335,AT5G14200,myc234_49h_rCol_rH_down,49h,Col under High R/FR,down,GO:0019761, isopropylmalate dehydrogenase 1 ,ATIMD1;IMD1,glucosinolate biosynthetic process,"The chemical reactions and pathways resulting in the formation of glucosinolates, substituted thioglucosides found in rapeseed products and related cruciferae."
336,AT4G13770,myc234_49h_rCol_rH_down,49h,Col under High R/FR,down,GO:0019761," cytochrome P450, family 83, subfamily A, polypeptide 1 ",CYP83A1;REF2,glucosinolate biosynthetic process,"The chemical reactions and pathways resulting in the formation of glucosinolates, substituted thioglucosides found in rapeseed products and related cruciferae."
337,AT3G58990,myc234_49h_rCol_rH_down,49h,Col under High R/FR,down,GO:0019761, isopropylmalate isomerase 1 ,IPMI1,glucosinolate biosynthetic process,"The chemical reactions and pathways resulting in the formation of glucosinolates, substituted thioglucosides found in rapeseed products and related cruciferae."
338,AT2G25450,myc234_49h_rCol_rH_down,49h,Col under High R/FR,down,GO:0019761, 2-oxoglutarate (2OG) and Fe(II)-dependent oxygenase superfamily protein ,NA,glucosinolate biosynthetic process,"The chemical reactions and pathways resulting in the formation of glucosinolates, substituted thioglucosides found in rapeseed products and related cruciferae."
339,AT1G18590,myc234_49h_rCol_rH_down,49h,Col under High R/FR,down,GO:0019761, sulfotransferase 17 ,ATSOT17;ATST5C;SOT17,glucosinolate biosynthetic process,"The chemical reactions and pathways resulting in the formation of glucosinolates, substituted thioglucosides found in rapeseed products and related cruciferae."
340,AT1G24100,myc234_49h_rCol_rH_down,49h,Col under High R/FR,down,GO:0019761, UDP-glucosyl transferase 74B1 ,UGT74B1,glucosinolate biosynthetic process,"The chemical reactions and pathways resulting in the formation of glucosinolates, substituted thioglucosides found in rapeseed products and related cruciferae."
341,AT1G74090,myc234_49h_rCol_rH_down,49h,Col under High R/FR,down,GO:0019761, desulfo-glucosinolate sulfotransferase 18 ,ATSOT18;ATST5B;SOT18,glucosinolate biosynthetic process,"The chemical reactions and pathways resulting in the formation of glucosinolates, substituted thioglucosides found in rapeseed products and related cruciferae."
342,AT4G12030,myc234_49h_rCol_rH_down,49h,Col under High R/FR,down,GO:0019761, bile acid transporter 5 ,BASS5;BAT5,glucosinolate biosynthetic process,"The chemical reactions and pathways resulting in the formation of glucosinolates, substituted thioglucosides found in rapeseed products and related cruciferae."
343,AT2G20610,myc234_49h_rCol_rH_down,49h,Col under High R/FR,down,GO:0019761, Tyrosine transaminase family protein ,ALF1;HLS3;RTY;RTY1;SUR1,glucosinolate biosynthetic process,"The chemical reactions and pathways resulting in the formation of glucosinolates, substituted thioglucosides found in rapeseed products and related cruciferae."
344,AT1G62560,myc234_49h_rCol_rH_down,49h,Col under High R/FR,down,GO:0019761, flavin-monooxygenase glucosinolate S-oxygenase 3 ,FMO GS-OX3,glucosinolate biosynthetic process,"The chemical reactions and pathways resulting in the formation of glucosinolates, substituted thioglucosides found in rapeseed products and related cruciferae."
345,AT1G74100,myc234_49h_rCol_rH_down,49h,Col under High R/FR,down,GO:0019761, sulfotransferase 16 ,ATSOT16;ATST5A;CORI-7;SOT16,glucosinolate biosynthetic process,"The chemical reactions and pathways resulting in the formation of glucosinolates, substituted thioglucosides found in rapeseed products and related cruciferae."
346,AT2G22330,myc234_49h_rCol_rH_down,49h,Col under High R/FR,down,GO:0019761," cytochrome P450, family 79, subfamily B, polypeptide 3 ",CYP79B3,glucosinolate biosynthetic process,"The chemical reactions and pathways resulting in the formation of glucosinolates, substituted thioglucosides found in rapeseed products and related cruciferae."
347,AT1G16400,myc234_49h_rCol_rH_down,49h,Col under High R/FR,down,GO:0019761," cytochrome P450, family 79, subfamily F, polypeptide 2 ",CYP79F2,glucosinolate biosynthetic process,"The chemical reactions and pathways resulting in the formation of glucosinolates, substituted thioglucosides found in rapeseed products and related cruciferae."
348,AT4G13430,myc234_49h_rCol_rH_down,49h,Col under High R/FR,down,GO:0019761, isopropyl malate isomerase large subunit 1 ,ATLEUC1;IIL1,glucosinolate biosynthetic process,"The chemical reactions and pathways resulting in the formation of glucosinolates, substituted thioglucosides found in rapeseed products and related cruciferae."
349,AT5G59540,myc234_49h_rCol_rH_down,49h,Col under High R/FR,down,GO:0019761, 2-oxoglutarate (2OG) and Fe(II)-dependent oxygenase superfamily protein ,NA,glucosinolate biosynthetic process,"The chemical reactions and pathways resulting in the formation of glucosinolates, substituted thioglucosides found in rapeseed products and related cruciferae."
350,AT3G52380,myc234_49h_rCol_rH_down,49h,Col under High R/FR,down,GO:0031425, chloroplast RNA-binding protein 33 ,CP33;PDE322,chloroplast RNA processing,The conversion of a primary RNA molecule transcribed from a chloroplast genome into one or more mature RNA molecules.
351,AT1G08070,myc234_49h_rCol_rH_down,49h,Col under High R/FR,down,GO:0031425, Tetratricopeptide repeat (TPR)-like superfamily protein ,EMB3102;OTP82,chloroplast RNA processing,The conversion of a primary RNA molecule transcribed from a chloroplast genome into one or more mature RNA molecules.
352,AT2G29760,myc234_49h_rCol_rH_down,49h,Col under High R/FR,down,GO:0031425, Tetratricopeptide repeat (TPR)-like superfamily protein ,OTP81;QED1,chloroplast RNA processing,The conversion of a primary RNA molecule transcribed from a chloroplast genome into one or more mature RNA molecules.
353,AT5G13650,myc234_49h_rCol_rH_down,49h,Col under High R/FR,down,GO:0031425, elongation factor family protein ,SVR3,chloroplast RNA processing,The conversion of a primary RNA molecule transcribed from a chloroplast genome into one or more mature RNA molecules.
354,AT3G05730,myc234_49h_rCol_rH_down,49h,Col under High R/FR,down,GO:0031640, Encodes a defensin-like (DEFL) family protein. ,NA,killing of cells of other organism,"Any process in an organism that results in the killing of cells of another organism, including in some cases the death of the other organism. Killing here refers to the induction of death in one cell by another cell, not cell-autonomous death due to internal or other environmental conditions."
355,AT2G43530,myc234_49h_rCol_rH_down,49h,Col under High R/FR,down,GO:0031640, Scorpion toxin-like knottin superfamily protein ,NA,killing of cells of other organism,"Any process in an organism that results in the killing of cells of another organism, including in some cases the death of the other organism. Killing here refers to the induction of death in one cell by another cell, not cell-autonomous death due to internal or other environmental conditions."
356,AT1G11580,myc234_49h_rCol_rH_down,49h,Col under High R/FR,down,GO:0031640, methylesterase PCR A ,ATPMEPCRA;PMEPCRA,killing of cells of other organism,"Any process in an organism that results in the killing of cells of another organism, including in some cases the death of the other organism. Killing here refers to the induction of death in one cell by another cell, not cell-autonomous death due to internal or other environmental conditions."
357,AT2G43550,myc234_49h_rCol_rH_down,49h,Col under High R/FR,down,GO:0031640, Scorpion toxin-like knottin superfamily protein ,NA,killing of cells of other organism,"Any process in an organism that results in the killing of cells of another organism, including in some cases the death of the other organism. Killing here refers to the induction of death in one cell by another cell, not cell-autonomous death due to internal or other environmental conditions."
358,AT2G43535,myc234_49h_rCol_rH_down,49h,Col under High R/FR,down,GO:0031640, Scorpion toxin-like knottin superfamily protein ,NA,killing of cells of other organism,"Any process in an organism that results in the killing of cells of another organism, including in some cases the death of the other organism. Killing here refers to the induction of death in one cell by another cell, not cell-autonomous death due to internal or other environmental conditions."
359,AT1G60989,myc234_49h_rCol_rH_down,49h,Col under High R/FR,down,GO:0031640, SCR-like 7 ,SCRL7,killing of cells of other organism,"Any process in an organism that results in the killing of cells of another organism, including in some cases the death of the other organism. Killing here refers to the induction of death in one cell by another cell, not cell-autonomous death due to internal or other environmental conditions."
360,AT3G05730,myc234_49h_rCol_rH_down,49h,Col under High R/FR,down,GO:0050832, Encodes a defensin-like (DEFL) family protein. ,NA,defense response to fungus,Reactions triggered in response to the presence of a fungus that act to protect the cell or organism.
361,AT1G52410,myc234_49h_rCol_rH_down,49h,Col under High R/FR,down,GO:0050832, TSK-associating protein 1 ,AtTSA1;TSA1,defense response to fungus,Reactions triggered in response to the presence of a fungus that act to protect the cell or organism.
362,AT2G43530,myc234_49h_rCol_rH_down,49h,Col under High R/FR,down,GO:0050832, Scorpion toxin-like knottin superfamily protein ,NA,defense response to fungus,Reactions triggered in response to the presence of a fungus that act to protect the cell or organism.
363,AT5G42650,myc234_49h_rCol_rH_down,49h,Col under High R/FR,down,GO:0050832, allene oxide synthase ,AOS;CYP74A;DDE2,defense response to fungus,Reactions triggered in response to the presence of a fungus that act to protect the cell or organism.
364,AT3G13790,myc234_49h_rCol_rH_down,49h,Col under High R/FR,down,GO:0050832, Glycosyl hydrolases family 32 protein ,ATBFRUCT1;AtCWI1;ATCWINV1;CWI1,defense response to fungus,Reactions triggered in response to the presence of a fungus that act to protect the cell or organism.
365,AT1G11580,myc234_49h_rCol_rH_down,49h,Col under High R/FR,down,GO:0050832, methylesterase PCR A ,ATPMEPCRA;PMEPCRA,defense response to fungus,Reactions triggered in response to the presence of a fungus that act to protect the cell or organism.
366,AT2G38870,myc234_49h_rCol_rH_down,49h,Col under High R/FR,down,GO:0050832," Serine protease inhibitor, potato inhibitor I-type family protein ",NA,defense response to fungus,Reactions triggered in response to the presence of a fungus that act to protect the cell or organism.
367,AT2G43550,myc234_49h_rCol_rH_down,49h,Col under High R/FR,down,GO:0050832, Scorpion toxin-like knottin superfamily protein ,NA,defense response to fungus,Reactions triggered in response to the presence of a fungus that act to protect the cell or organism.
368,AT2G43535,myc234_49h_rCol_rH_down,49h,Col under High R/FR,down,GO:0050832, Scorpion toxin-like knottin superfamily protein ,NA,defense response to fungus,Reactions triggered in response to the presence of a fungus that act to protect the cell or organism.
369,AT1G52400,myc234_49h_rCol_rH_down,49h,Col under High R/FR,down,GO:0050832, beta glucosidase 18 ,ATBG1;BGL1;BGLU18,defense response to fungus,Reactions triggered in response to the presence of a fungus that act to protect the cell or organism.
370,AT1G56650,myc234_49h_rCol_rH_down,49h,Col under High R/FR,down,GO:0050832, production of anthocyanin pigment 1 ,ATMYB75;AtPAP1;MYB75;PAP1;SIAA1,defense response to fungus,Reactions triggered in response to the presence of a fungus that act to protect the cell or organism.
371,AT1G19670,myc234_49h_rCol_rH_down,49h,Col under High R/FR,down,GO:0050832, chlorophyllase 1 ,ATCLH1;ATHCOR1;CLH1;CORI1,defense response to fungus,Reactions triggered in response to the presence of a fungus that act to protect the cell or organism.
372,AT3G17210,myc234_49h_rCol_rH_down,49h,Col under High R/FR,down,GO:0050832, heat stable protein 1 ,ATHS1;HS1,defense response to fungus,Reactions triggered in response to the presence of a fungus that act to protect the cell or organism.
373,AT1G01470,myc234_49h_rCol_rH_down,49h,Col under High R/FR,down,GO:0050832, Late embryogenesis abundant protein ,AtLEA14;LEA1;LEA14;LSR3,defense response to fungus,Reactions triggered in response to the presence of a fungus that act to protect the cell or organism.
374,AT1G60989,myc234_49h_rCol_rH_down,49h,Col under High R/FR,down,GO:0050832, SCR-like 7 ,SCRL7,defense response to fungus,Reactions triggered in response to the presence of a fungus that act to protect the cell or organism.
375,AT2G42530,myc234_49h_rCol_rH_down,49h,Col under High R/FR,down,GO:0050832, cold regulated 15b ,COR15B,defense response to fungus,Reactions triggered in response to the presence of a fungus that act to protect the cell or organism.
376,AT5G07690,myc234_49h_rCol_rH_down,49h,Col under High R/FR,down,GO:0050832, myb domain protein 29 ,ATMYB29;MYB29;PMG2;RAO7,defense response to fungus,Reactions triggered in response to the presence of a fungus that act to protect the cell or organism.
377,AT4G31500,myc234_49h_rCol_rH_down,49h,Col under High R/FR,down,GO:0052544," cytochrome P450, family 83, subfamily B, polypeptide 1 ",ATR4;CYP83B1;RED1;RNT1;SUR2,defense response by callose deposition in cell wall,"Any process in which callose is transported to, and/or maintained in, the cell wall during the defense response. Callose is a linear 1,3-beta-d-glucan formed from UDP-glucose and is found in certain plant cell walls."
378,AT1G24100,myc234_49h_rCol_rH_down,49h,Col under High R/FR,down,GO:0052544, UDP-glucosyl transferase 74B1 ,UGT74B1,defense response by callose deposition in cell wall,"Any process in which callose is transported to, and/or maintained in, the cell wall during the defense response. Callose is a linear 1,3-beta-d-glucan formed from UDP-glucose and is found in certain plant cell walls."
379,AT4G39950,myc234_49h_rCol_rH_down,49h,Col under High R/FR,down,GO:0052544," cytochrome P450, family 79, subfamily B, polypeptide 2 ",CYP79B2,defense response by callose deposition in cell wall,"Any process in which callose is transported to, and/or maintained in, the cell wall during the defense response. Callose is a linear 1,3-beta-d-glucan formed from UDP-glucose and is found in certain plant cell walls."
380,AT2G22330,myc234_49h_rCol_rH_down,49h,Col under High R/FR,down,GO:0052544," cytochrome P450, family 79, subfamily B, polypeptide 3 ",CYP79B3,defense response by callose deposition in cell wall,"Any process in which callose is transported to, and/or maintained in, the cell wall during the defense response. Callose is a linear 1,3-beta-d-glucan formed from UDP-glucose and is found in certain plant cell walls."
381,AT3G54640,myc234_49h_rCol_rH_down,49h,Col under High R/FR,down,GO:0052544, tryptophan synthase alpha chain ,TRP3;TSA1,defense response by callose deposition in cell wall,"Any process in which callose is transported to, and/or maintained in, the cell wall during the defense response. Callose is a linear 1,3-beta-d-glucan formed from UDP-glucose and is found in certain plant cell walls."
382,AT1G16410,myc234_49h_rCol_rH_down,49h,Col under High R/FR,down,GO:0055114, cytochrome p450 79f1 ,BUS1;CYP79F1;SPS1,oxidation-reduction process,"A metabolic process that results in the removal or addition of one or more electrons to or from a substance, with or without the concomitant removal or addition of a proton or protons."
383,AT4G13770,myc234_49h_rCol_rH_down,49h,Col under High R/FR,down,GO:0055114," cytochrome P450, family 83, subfamily A, polypeptide 1 ",CYP83A1;REF2,oxidation-reduction process,"A metabolic process that results in the removal or addition of one or more electrons to or from a substance, with or without the concomitant removal or addition of a proton or protons."
384,AT2G30860,myc234_49h_rCol_rH_down,49h,Col under High R/FR,down,GO:0055114, glutathione S-transferase PHI 9 ,ATGSTF7;ATGSTF9;GLUTTR;GSTF9,oxidation-reduction process,"A metabolic process that results in the removal or addition of one or more electrons to or from a substance, with or without the concomitant removal or addition of a proton or protons."
385,AT2G25450,myc234_49h_rCol_rH_down,49h,Col under High R/FR,down,GO:0055114, 2-oxoglutarate (2OG) and Fe(II)-dependent oxygenase superfamily protein ,NA,oxidation-reduction process,"A metabolic process that results in the removal or addition of one or more electrons to or from a substance, with or without the concomitant removal or addition of a proton or protons."
386,AT4G31500,myc234_49h_rCol_rH_down,49h,Col under High R/FR,down,GO:0055114," cytochrome P450, family 83, subfamily B, polypeptide 1 ",ATR4;CYP83B1;RED1;RNT1;SUR2,oxidation-reduction process,"A metabolic process that results in the removal or addition of one or more electrons to or from a substance, with or without the concomitant removal or addition of a proton or protons."
387,AT4G04610,myc234_49h_rCol_rH_down,49h,Col under High R/FR,down,GO:0055114, APS reductase 1 ,APR;APR1;ATAPR1;PRH19,oxidation-reduction process,"A metabolic process that results in the removal or addition of one or more electrons to or from a substance, with or without the concomitant removal or addition of a proton or protons."
388,AT1G65860,myc234_49h_rCol_rH_down,49h,Col under High R/FR,down,GO:0055114, flavin-monooxygenase glucosinolate S-oxygenase 1 ,FMO GS-OX1,oxidation-reduction process,"A metabolic process that results in the removal or addition of one or more electrons to or from a substance, with or without the concomitant removal or addition of a proton or protons."
389,AT1G62560,myc234_49h_rCol_rH_down,49h,Col under High R/FR,down,GO:0055114, flavin-monooxygenase glucosinolate S-oxygenase 3 ,FMO GS-OX3,oxidation-reduction process,"A metabolic process that results in the removal or addition of one or more electrons to or from a substance, with or without the concomitant removal or addition of a proton or protons."
390,AT4G39950,myc234_49h_rCol_rH_down,49h,Col under High R/FR,down,GO:0055114," cytochrome P450, family 79, subfamily B, polypeptide 2 ",CYP79B2,oxidation-reduction process,"A metabolic process that results in the removal or addition of one or more electrons to or from a substance, with or without the concomitant removal or addition of a proton or protons."
391,AT2G22330,myc234_49h_rCol_rH_down,49h,Col under High R/FR,down,GO:0055114," cytochrome P450, family 79, subfamily B, polypeptide 3 ",CYP79B3,oxidation-reduction process,"A metabolic process that results in the removal or addition of one or more electrons to or from a substance, with or without the concomitant removal or addition of a proton or protons."
392,AT5G07460,myc234_49h_rCol_rH_down,49h,Col under High R/FR,down,GO:0055114, peptidemethionine sulfoxide reductase 2 ,ATMSRA2;PMSR2,oxidation-reduction process,"A metabolic process that results in the removal or addition of one or more electrons to or from a substance, with or without the concomitant removal or addition of a proton or protons."
393,AT1G16400,myc234_49h_rCol_rH_down,49h,Col under High R/FR,down,GO:0055114," cytochrome P450, family 79, subfamily F, polypeptide 2 ",CYP79F2,oxidation-reduction process,"A metabolic process that results in the removal or addition of one or more electrons to or from a substance, with or without the concomitant removal or addition of a proton or protons."
394,AT5G42250,myc234_49h_rCol_rH_down,49h,Col under High R/FR,down,GO:0055114, Zinc-binding alcohol dehydrogenase family protein ,NA,oxidation-reduction process,"A metabolic process that results in the removal or addition of one or more electrons to or from a substance, with or without the concomitant removal or addition of a proton or protons."
395,AT4G37410,myc234_49h_rCol_rH_down,49h,Col under High R/FR,down,GO:0055114," cytochrome P450, family 81, subfamily F, polypeptide 4 ",CYP81F4,oxidation-reduction process,"A metabolic process that results in the removal or addition of one or more electrons to or from a substance, with or without the concomitant removal or addition of a proton or protons."
396,AT4G21990,myc234_49h_rCol_rH_down,49h,Col under High R/FR,down,GO:0055114, APS reductase 3 ,APR3;ATAPR3;PRH-26;PRH26,oxidation-reduction process,"A metabolic process that results in the removal or addition of one or more electrons to or from a substance, with or without the concomitant removal or addition of a proton or protons."
397,AT4G04830,myc234_49h_rCol_rH_down,49h,Col under High R/FR,down,GO:0055114, methionine sulfoxide reductase B5 ,ATMSRB5;MSRB5,oxidation-reduction process,"A metabolic process that results in the removal or addition of one or more electrons to or from a substance, with or without the concomitant removal or addition of a proton or protons."
398,AT5G25130,myc234_49h_rCol_rH_down,49h,Col under High R/FR,down,GO:0055114," cytochrome P450, family 71, subfamily B, polypeptide 12 ",CYP71B12,oxidation-reduction process,"A metabolic process that results in the removal or addition of one or more electrons to or from a substance, with or without the concomitant removal or addition of a proton or protons."
399,AT4G12310,myc234_49h_rCol_rH_down,49h,Col under High R/FR,down,GO:0055114," cytochrome P450, family 706, subfamily A, polypeptide 5 ",CYP706A5,oxidation-reduction process,"A metabolic process that results in the removal or addition of one or more electrons to or from a substance, with or without the concomitant removal or addition of a proton or protons."
400,AT5G42650,myc234_49h_rCol_rH_down,49h,Col under High R/FR,down,GO:0055114, allene oxide synthase ,AOS;CYP74A;DDE2,oxidation-reduction process,"A metabolic process that results in the removal or addition of one or more electrons to or from a substance, with or without the concomitant removal or addition of a proton or protons."
401,AT2G22170,myc234_49h_rCol_rH_down,49h,Col under High R/FR,down,GO:0055114," Lipase/lipooxygenase, PLAT/LH2 family protein ",PLAT2,oxidation-reduction process,"A metabolic process that results in the removal or addition of one or more electrons to or from a substance, with or without the concomitant removal or addition of a proton or protons."
402,AT2G06050,myc234_49h_rCol_rH_down,49h,Col under High R/FR,down,GO:0055114, oxophytodienoate-reductase 3 ,AtOPR3;DDE1;OPR3,oxidation-reduction process,"A metabolic process that results in the removal or addition of one or more electrons to or from a substance, with or without the concomitant removal or addition of a proton or protons."
403,AT5G04590,myc234_49h_rCol_rH_down,49h,Col under High R/FR,down,GO:0055114, sulfite reductase ,SIR,oxidation-reduction process,"A metabolic process that results in the removal or addition of one or more electrons to or from a substance, with or without the concomitant removal or addition of a proton or protons."
404,AT5G59540,myc234_49h_rCol_rH_down,49h,Col under High R/FR,down,GO:0055114, 2-oxoglutarate (2OG) and Fe(II)-dependent oxygenase superfamily protein ,NA,oxidation-reduction process,"A metabolic process that results in the removal or addition of one or more electrons to or from a substance, with or without the concomitant removal or addition of a proton or protons."
405,AT5G06690,myc234_49h_rCol_rH_down,49h,Col under High R/FR,down,GO:0055114, WCRKC thioredoxin 1 ,WCRKC1,oxidation-reduction process,"A metabolic process that results in the removal or addition of one or more electrons to or from a substance, with or without the concomitant removal or addition of a proton or protons."
406,AT3G19000,myc234_49h_rCol_rH_down,49h,Col under High R/FR,down,GO:0055114, 2-oxoglutarate (2OG) and Fe(II)-dependent oxygenase superfamily protein ,NA,oxidation-reduction process,"A metabolic process that results in the removal or addition of one or more electrons to or from a substance, with or without the concomitant removal or addition of a proton or protons."
407,AT2G34060,myc234_49h_rCol_rH_down,49h,Col under High R/FR,down,GO:0055114, Peroxidase superfamily protein ,NA,oxidation-reduction process,"A metabolic process that results in the removal or addition of one or more electrons to or from a substance, with or without the concomitant removal or addition of a proton or protons."
408,AT1G76080,myc234_49h_rCol_rH_down,49h,Col under High R/FR,down,GO:0055114, chloroplastic drought-induced stress protein of 32 kD ,ATCDSP32;CDSP32,oxidation-reduction process,"A metabolic process that results in the removal or addition of one or more electrons to or from a substance, with or without the concomitant removal or addition of a proton or protons."
409,AT5G54190,myc234_49h_rCol_rH_down,49h,Col under High R/FR,down,GO:0055114, protochlorophyllide oxidoreductase A ,PORA,oxidation-reduction process,"A metabolic process that results in the removal or addition of one or more electrons to or from a substance, with or without the concomitant removal or addition of a proton or protons."
410,AT5G53580,myc234_49h_rCol_rH_down,49h,Col under High R/FR,down,GO:0055114, NAD(P)-linked oxidoreductase superfamily protein ,AtPLR1;PLR1,oxidation-reduction process,"A metabolic process that results in the removal or addition of one or more electrons to or from a substance, with or without the concomitant removal or addition of a proton or protons."
411,AT3G11170,myc234_49h_rCol_rH_down,49h,Col under High R/FR,down,GO:0055114, fatty acid desaturase 7 ,AtFAD7;FAD7;FADD,oxidation-reduction process,"A metabolic process that results in the removal or addition of one or more electrons to or from a substance, with or without the concomitant removal or addition of a proton or protons."
412,AT1G79440,myc234_49h_rCol_rH_down,49h,Col under High R/FR,down,GO:0055114, aldehyde dehydrogenase 5F1 ,ALDH5F1;ENF1;SSADH;SSADH1,oxidation-reduction process,"A metabolic process that results in the removal or addition of one or more electrons to or from a substance, with or without the concomitant removal or addition of a proton or protons."
413,AT5G38430,myc234_49h_rCol_rH_down,49h,Col under High R/FR,down,GO:0055114, Ribulose bisphosphate carboxylase (small chain) family protein ,RBCS1B,oxidation-reduction process,"A metabolic process that results in the removal or addition of one or more electrons to or from a substance, with or without the concomitant removal or addition of a proton or protons."
414,AT2G32440,myc234_49h_rCol_rH_down,49h,Col under High R/FR,down,GO:0055114, ent-kaurenoic acid hydroxylase 2 ,ATKAO2;CYP88A4;KAO2,oxidation-reduction process,"A metabolic process that results in the removal or addition of one or more electrons to or from a substance, with or without the concomitant removal or addition of a proton or protons."
415,AT3G48000,myc234_49h_rCol_rH_down,49h,Col under High R/FR,down,GO:0055114, aldehyde dehydrogenase 2B4 ,ALDH2;ALDH2A;ALDH2B4,oxidation-reduction process,"A metabolic process that results in the removal or addition of one or more electrons to or from a substance, with or without the concomitant removal or addition of a proton or protons."
416,AT1G15550,myc234_49h_rCol_rH_down,49h,Col under High R/FR,down,GO:0055114, gibberellin 3-oxidase 1 ,ATGA3OX1;GA3OX1;GA4,oxidation-reduction process,"A metabolic process that results in the removal or addition of one or more electrons to or from a substance, with or without the concomitant removal or addition of a proton or protons."
417,AT3G16950,myc234_49h_rCol_rH_down,49h,Col under High R/FR,down,GO:0055114, lipoamide dehydrogenase 1 ,LPD1;ptlpd1,oxidation-reduction process,"A metabolic process that results in the removal or addition of one or more electrons to or from a substance, with or without the concomitant removal or addition of a proton or protons."
418,AT5G54080,myc234_49h_rCol_rH_down,49h,Col under High R/FR,down,GO:0055114," homogentisate 1,2-dioxygenase ",AtHGO;HGO,oxidation-reduction process,"A metabolic process that results in the removal or addition of one or more electrons to or from a substance, with or without the concomitant removal or addition of a proton or protons."
419,AT2G29260,myc234_49h_rCol_rH_down,49h,Col under High R/FR,down,GO:0055114, NAD(P)-binding Rossmann-fold superfamily protein ,NA,oxidation-reduction process,"A metabolic process that results in the removal or addition of one or more electrons to or from a substance, with or without the concomitant removal or addition of a proton or protons."
420,AT4G19380,myc234_49h_rCol_rH_down,49h,Col under High R/FR,down,GO:0055114, Long-chain fatty alcohol dehydrogenase family protein ,NA,oxidation-reduction process,"A metabolic process that results in the removal or addition of one or more electrons to or from a substance, with or without the concomitant removal or addition of a proton or protons."
421,AT1G57770,myc234_49h_rCol_rH_down,49h,Col under High R/FR,down,GO:0055114, FAD/NAD(P)-binding oxidoreductase family protein ,NA,oxidation-reduction process,"A metabolic process that results in the removal or addition of one or more electrons to or from a substance, with or without the concomitant removal or addition of a proton or protons."
422,AT4G20960,myc234_49h_rCol_rH_down,49h,Col under High R/FR,down,GO:0055114, Cytidine/deoxycytidylate deaminase family protein ,PyrD,oxidation-reduction process,"A metabolic process that results in the removal or addition of one or more electrons to or from a substance, with or without the concomitant removal or addition of a proton or protons."
423,AT4G01690,myc234_49h_rCol_rH_down,49h,Col under High R/FR,down,GO:0055114, Flavin containing amine oxidoreductase family ,HEMG1;PPO1;PPOX,oxidation-reduction process,"A metabolic process that results in the removal or addition of one or more electrons to or from a substance, with or without the concomitant removal or addition of a proton or protons."
424,AT1G32780,myc234_49h_rCol_rH_down,49h,Col under High R/FR,down,GO:0055114, GroES-like zinc-binding dehydrogenase family protein ,NA,oxidation-reduction process,"A metabolic process that results in the removal or addition of one or more electrons to or from a substance, with or without the concomitant removal or addition of a proton or protons."
425,AT4G12420,myc234_49h_rCol_rH_down,49h,Col under High R/FR,down,GO:0055114, Cupredoxin superfamily protein ,SKU5,oxidation-reduction process,"A metabolic process that results in the removal or addition of one or more electrons to or from a substance, with or without the concomitant removal or addition of a proton or protons."
426,AT1G14520,myc234_49h_rCol_rH_down,49h,Col under High R/FR,down,GO:0055114, myo-inositol oxygenase 1 ,MIOX1,oxidation-reduction process,"A metabolic process that results in the removal or addition of one or more electrons to or from a substance, with or without the concomitant removal or addition of a proton or protons."
427,AT3G45140,myc234_49h_rCol_rH_down,49h,Col under High R/FR,down,GO:0055114, lipoxygenase 2 ,ATLOX2;LOX2,oxidation-reduction process,"A metabolic process that results in the removal or addition of one or more electrons to or from a substance, with or without the concomitant removal or addition of a proton or protons."
428,AT1G15140,myc234_49h_rCol_rH_down,49h,Col under High R/FR,down,GO:0055114, FAD/NAD(P)-binding oxidoreductase ,FNRL,oxidation-reduction process,"A metabolic process that results in the removal or addition of one or more electrons to or from a substance, with or without the concomitant removal or addition of a proton or protons."
429,AT5G38420,myc234_49h_rCol_rH_down,49h,Col under High R/FR,down,GO:0055114, Ribulose bisphosphate carboxylase (small chain) family protein ,RBCS2B,oxidation-reduction process,"A metabolic process that results in the removal or addition of one or more electrons to or from a substance, with or without the concomitant removal or addition of a proton or protons."
430,AT5G35790,myc234_49h_rCol_rH_down,49h,Col under High R/FR,down,GO:0055114, glucose-6-phosphate dehydrogenase 1 ,G6PD1,oxidation-reduction process,"A metabolic process that results in the removal or addition of one or more electrons to or from a substance, with or without the concomitant removal or addition of a proton or protons."
431,AT4G36220,myc234_49h_rCol_rH_down,49h,Col under High R/FR,down,GO:0055114, ferulic acid 5-hydroxylase 1 ,CYP84A1;FAH1,oxidation-reduction process,"A metabolic process that results in the removal or addition of one or more electrons to or from a substance, with or without the concomitant removal or addition of a proton or protons."
432,AT2G44040,myc234_49h_rCol_rH_down,49h,Col under High R/FR,down,GO:0055114," Dihydrodipicolinate reductase, bacterial/plant ",NA,oxidation-reduction process,"A metabolic process that results in the removal or addition of one or more electrons to or from a substance, with or without the concomitant removal or addition of a proton or protons."
433,AT4G39940,myc234_49h_rCol_rH_down,49h,Col under High R/FR,down,GO:0070814, APS-kinase 2 ,AKN2;APK2,hydrogen sulfide biosynthetic process,"The chemical reactions and pathways resulting in the formation of hydrogen sulfide, H2S."
434,AT2G14750,myc234_49h_rCol_rH_down,49h,Col under High R/FR,down,GO:0070814, APS kinase ,AKN1;APK;APK1;ATAKN1,hydrogen sulfide biosynthetic process,"The chemical reactions and pathways resulting in the formation of hydrogen sulfide, H2S."
435,AT4G14680,myc234_49h_rCol_rH_down,49h,Col under High R/FR,down,GO:0070814, Pseudouridine synthase/archaeosine transglycosylase-like family protein ,APS3;ATPS3,hydrogen sulfide biosynthetic process,"The chemical reactions and pathways resulting in the formation of hydrogen sulfide, H2S."
436,AT3G22890,myc234_49h_rCol_rH_down,49h,Col under High R/FR,down,GO:0070814, ATP sulfurylase 1 ,APS1;ATPS1,hydrogen sulfide biosynthetic process,"The chemical reactions and pathways resulting in the formation of hydrogen sulfide, H2S."
437,AT5G07460,myc234_49h_rCol_rH_down,49h,Col under High R/FR,down,GO:0080167, peptidemethionine sulfoxide reductase 2 ,ATMSRA2;PMSR2,response to karrikin,"Any process that results in a change in state or activity of a cell or an organism (in terms of movement, secretion, enzyme production, gene expression, etc.) as a result of a karrikin stimulus. Karrikins are signaling molecules in smoke from burning vegetation that trigger seed germination for many angiosperms (flowering plants)."
438,AT3G13790,myc234_49h_rCol_rH_down,49h,Col under High R/FR,down,GO:0080167, Glycosyl hydrolases family 32 protein ,ATBFRUCT1;AtCWI1;ATCWINV1;CWI1,response to karrikin,"Any process that results in a change in state or activity of a cell or an organism (in terms of movement, secretion, enzyme production, gene expression, etc.) as a result of a karrikin stimulus. Karrikins are signaling molecules in smoke from burning vegetation that trigger seed germination for many angiosperms (flowering plants)."
439,AT1G10960,myc234_49h_rCol_rH_down,49h,Col under High R/FR,down,GO:0080167, ferredoxin 1 ,ATFD1;FD1,response to karrikin,"Any process that results in a change in state or activity of a cell or an organism (in terms of movement, secretion, enzyme production, gene expression, etc.) as a result of a karrikin stimulus. Karrikins are signaling molecules in smoke from burning vegetation that trigger seed germination for many angiosperms (flowering plants)."
440,AT2G36080,myc234_49h_rCol_rH_down,49h,Col under High R/FR,down,GO:0080167, AP2/B3-like transcriptional factor family protein ,ABS2;NGAL1,response to karrikin,"Any process that results in a change in state or activity of a cell or an organism (in terms of movement, secretion, enzyme production, gene expression, etc.) as a result of a karrikin stimulus. Karrikins are signaling molecules in smoke from burning vegetation that trigger seed germination for many angiosperms (flowering plants)."
441,AT3G22840,myc234_49h_rCol_rH_down,49h,Col under High R/FR,down,GO:0080167, Chlorophyll A-B binding family protein ,ELIP;ELIP1,response to karrikin,"Any process that results in a change in state or activity of a cell or an organism (in terms of movement, secretion, enzyme production, gene expression, etc.) as a result of a karrikin stimulus. Karrikins are signaling molecules in smoke from burning vegetation that trigger seed germination for many angiosperms (flowering plants)."
442,AT1G74670,myc234_49h_rCol_rH_down,49h,Col under High R/FR,down,GO:0080167, Gibberellin-regulated family protein ,GASA6,response to karrikin,"Any process that results in a change in state or activity of a cell or an organism (in terms of movement, secretion, enzyme production, gene expression, etc.) as a result of a karrikin stimulus. Karrikins are signaling molecules in smoke from burning vegetation that trigger seed germination for many angiosperms (flowering plants)."
443,AT3G44450,myc234_49h_rCol_rH_down,49h,Col under High R/FR,down,GO:0080167, unknown protein; BEST Arabidopsis thaliana protein match is: unknown protein (TAIR:AT3G52740.1); Has 63 Blast hits to 63 proteins in 12 species: Archae - 0; Bacteria - 0; Metazoa - 0; Fungi - 0; Plants - 63; Viruses - 0; Other Eukaryotes - 0 (source: NCBI BLink). ,BIC2,response to karrikin,"Any process that results in a change in state or activity of a cell or an organism (in terms of movement, secretion, enzyme production, gene expression, etc.) as a result of a karrikin stimulus. Karrikins are signaling molecules in smoke from burning vegetation that trigger seed germination for many angiosperms (flowering plants)."
444,AT1G70420,myc234_49h_rCol_rH_down,49h,Col under High R/FR,down,GO:0080167, Protein of unknown function (DUF1645) ,NA,response to karrikin,"Any process that results in a change in state or activity of a cell or an organism (in terms of movement, secretion, enzyme production, gene expression, etc.) as a result of a karrikin stimulus. Karrikins are signaling molecules in smoke from burning vegetation that trigger seed germination for many angiosperms (flowering plants)."
445,AT5G20250,myc234_49h_rCol_rH_down,49h,Col under High R/FR,down,GO:0080167, Raffinose synthase family protein ,DIN10;RS6,response to karrikin,"Any process that results in a change in state or activity of a cell or an organism (in terms of movement, secretion, enzyme production, gene expression, etc.) as a result of a karrikin stimulus. Karrikins are signaling molecules in smoke from burning vegetation that trigger seed germination for many angiosperms (flowering plants)."
446,AT5G63810,myc234_49h_rCol_rH_down,49h,Col under High R/FR,down,GO:0080167, beta-galactosidase 10 ,AtBGAL10;BGAL10,response to karrikin,"Any process that results in a change in state or activity of a cell or an organism (in terms of movement, secretion, enzyme production, gene expression, etc.) as a result of a karrikin stimulus. Karrikins are signaling molecules in smoke from burning vegetation that trigger seed germination for many angiosperms (flowering plants)."
447,AT1G25275,myc234_49h_rCol_rH_down,49h,Col under High R/FR,down,GO:0080167, unknown protein; FUNCTIONS IN: molecular_function unknown; INVOLVED IN: response to karrikin; LOCATED IN: endomembrane system; EXPRESSED IN: 23 plant structures; EXPRESSED DURING: 13 growth stages; Has 35333 Blast hits to 34131 proteins in 2444 species: Archae - 798; Bacteria - 22429; Metazoa - 974; Fungi - 991; Plants - 531; Viruses - 0; Other Eukaryotes - 9610 (source: NCBI BLink). ,NA,response to karrikin,"Any process that results in a change in state or activity of a cell or an organism (in terms of movement, secretion, enzyme production, gene expression, etc.) as a result of a karrikin stimulus. Karrikins are signaling molecules in smoke from burning vegetation that trigger seed germination for many angiosperms (flowering plants)."
448,AT1G22770,myc234_49h_rCol_rH_down,49h,Col under High R/FR,down,GO:0080167, gigantea protein (GI) ,FB;GI,response to karrikin,"Any process that results in a change in state or activity of a cell or an organism (in terms of movement, secretion, enzyme production, gene expression, etc.) as a result of a karrikin stimulus. Karrikins are signaling molecules in smoke from burning vegetation that trigger seed germination for many angiosperms (flowering plants)."
449,AT5G25460,myc234_49h_rCol_rH_down,49h,Col under High R/FR,down,GO:0080167," Protein of unknown function, DUF642 ",DGR2,response to karrikin,"Any process that results in a change in state or activity of a cell or an organism (in terms of movement, secretion, enzyme production, gene expression, etc.) as a result of a karrikin stimulus. Karrikins are signaling molecules in smoke from burning vegetation that trigger seed germination for many angiosperms (flowering plants)."
450,AT3G21560,myc234_49h_rCol_rH_down,49h,Col under High R/FR,down,GO:0080167, UDP-Glycosyltransferase superfamily protein ,BRT1;UGT84A2,response to karrikin,"Any process that results in a change in state or activity of a cell or an organism (in terms of movement, secretion, enzyme production, gene expression, etc.) as a result of a karrikin stimulus. Karrikins are signaling molecules in smoke from burning vegetation that trigger seed germination for many angiosperms (flowering plants)."
451,AT1G44575,myc234_49h_rCol_rH_down,49h,Col under High R/FR,down,GO:0080167, Chlorophyll A-B binding family protein ,CP22;NPQ4;PSBS,response to karrikin,"Any process that results in a change in state or activity of a cell or an organism (in terms of movement, secretion, enzyme production, gene expression, etc.) as a result of a karrikin stimulus. Karrikins are signaling molecules in smoke from burning vegetation that trigger seed germination for many angiosperms (flowering plants)."
452,AT1G69120,myc234_49h_rCol_rH_up,49h,Col under High R/FR,up,GO:0007275, K-box region and MADS-box transcription factor family protein  ,AGL7;AP1;AtAP1,multicellular organism development,The biological process whose specific outcome is the progression of a multicellular organism over time from an initial condition (e.g. a zygote or a young adult) to a later condition (e.g. a multicellular animal or an aged adult).
453,AT5G19740,myc234_49h_rCol_rH_up,49h,Col under High R/FR,up,GO:0007275, Peptidase M28 family protein ,LAMP1,multicellular organism development,The biological process whose specific outcome is the progression of a multicellular organism over time from an initial condition (e.g. a zygote or a young adult) to a later condition (e.g. a multicellular animal or an aged adult).
454,AT4G18960,myc234_49h_rCol_rH_up,49h,Col under High R/FR,up,GO:0007275, K-box region and MADS-box transcription factor family protein  ,AG,multicellular organism development,The biological process whose specific outcome is the progression of a multicellular organism over time from an initial condition (e.g. a zygote or a young adult) to a later condition (e.g. a multicellular animal or an aged adult).
455,AT2G45660,myc234_49h_rCol_rH_up,49h,Col under High R/FR,up,GO:0007275, AGAMOUS-like 20 ,AGL20;ATSOC1;SOC1,multicellular organism development,The biological process whose specific outcome is the progression of a multicellular organism over time from an initial condition (e.g. a zygote or a young adult) to a later condition (e.g. a multicellular animal or an aged adult).
456,AT4G28190,myc234_49h_rCol_rH_up,49h,Col under High R/FR,up,GO:0007275," Developmental regulator, ULTRAPETALA ",ULT;ULT1,multicellular organism development,The biological process whose specific outcome is the progression of a multicellular organism over time from an initial condition (e.g. a zygote or a young adult) to a later condition (e.g. a multicellular animal or an aged adult).
457,AT5G65080,myc234_49h_rCol_rH_up,49h,Col under High R/FR,up,GO:0007275, K-box region and MADS-box transcription factor family protein  ,AGL68;MAF5,multicellular organism development,The biological process whose specific outcome is the progression of a multicellular organism over time from an initial condition (e.g. a zygote or a young adult) to a later condition (e.g. a multicellular animal or an aged adult).
458,AT5G60910,myc234_49h_rCol_rH_up,49h,Col under High R/FR,up,GO:0007275, AGAMOUS-like 8 ,AGL8;FUL,multicellular organism development,The biological process whose specific outcome is the progression of a multicellular organism over time from an initial condition (e.g. a zygote or a young adult) to a later condition (e.g. a multicellular animal or an aged adult).
459,AT4G24540,myc234_49h_rCol_rH_up,49h,Col under High R/FR,up,GO:0007275, AGAMOUS-like 24 ,AGL24,multicellular organism development,The biological process whose specific outcome is the progression of a multicellular organism over time from an initial condition (e.g. a zygote or a young adult) to a later condition (e.g. a multicellular animal or an aged adult).
460,AT4G30960,myc234_49h_rCol_rH_up,49h,Col under High R/FR,up,GO:0007275, SOS3-interacting protein 3 ,ATCIPK6;CIPK6;SIP3;SNRK3.14,multicellular organism development,The biological process whose specific outcome is the progression of a multicellular organism over time from an initial condition (e.g. a zygote or a young adult) to a later condition (e.g. a multicellular animal or an aged adult).
461,AT3G04740,myc234_49h_rCol_rH_up,49h,Col under High R/FR,up,GO:0007275, RNA polymerase II transcription mediators ,ATMED14;MED14;SWP,multicellular organism development,The biological process whose specific outcome is the progression of a multicellular organism over time from an initial condition (e.g. a zygote or a young adult) to a later condition (e.g. a multicellular animal or an aged adult).
462,AT1G24260,myc234_49h_rCol_rH_up,49h,Col under High R/FR,up,GO:0007275, K-box region and MADS-box transcription factor family protein  ,AGL9;SEP3,multicellular organism development,The biological process whose specific outcome is the progression of a multicellular organism over time from an initial condition (e.g. a zygote or a young adult) to a later condition (e.g. a multicellular animal or an aged adult).
463,AT4G16340,myc234_49h_rCol_rH_up,49h,Col under High R/FR,up,GO:0007275, guanyl-nucleotide exchange factors;GTPase binding;GTP binding ,SPK1,multicellular organism development,The biological process whose specific outcome is the progression of a multicellular organism over time from an initial condition (e.g. a zygote or a young adult) to a later condition (e.g. a multicellular animal or an aged adult).
464,AT3G25290,myc234_49h_rCol_rH_up,49h,Col under High R/FR,up,GO:0007275, Auxin-responsive family protein ,NA,multicellular organism development,The biological process whose specific outcome is the progression of a multicellular organism over time from an initial condition (e.g. a zygote or a young adult) to a later condition (e.g. a multicellular animal or an aged adult).
465,AT5G28490,myc234_49h_rCol_rH_up,49h,Col under High R/FR,up,GO:0007275, Protein of unknown function (DUF640) ,LSH1;OBO2,multicellular organism development,The biological process whose specific outcome is the progression of a multicellular organism over time from an initial condition (e.g. a zygote or a young adult) to a later condition (e.g. a multicellular animal or an aged adult).
466,AT2G45660,myc234_49h_rCol_rH_up,49h,Col under High R/FR,up,GO:0010077, AGAMOUS-like 20 ,AGL20;ATSOC1;SOC1,maintenance of inflorescence meristem identity,"The process in which an organism retains a population of inflorescence meristem cells, preventing the commitment of all stem cell progeny to a differentiated cell fate."
467,AT5G60910,myc234_49h_rCol_rH_up,49h,Col under High R/FR,up,GO:0010077, AGAMOUS-like 8 ,AGL8;FUL,maintenance of inflorescence meristem identity,"The process in which an organism retains a population of inflorescence meristem cells, preventing the commitment of all stem cell progeny to a differentiated cell fate."
468,AT4G24540,myc234_49h_rCol_rH_up,49h,Col under High R/FR,up,GO:0010077, AGAMOUS-like 24 ,AGL24,maintenance of inflorescence meristem identity,"The process in which an organism retains a population of inflorescence meristem cells, preventing the commitment of all stem cell progeny to a differentiated cell fate."
469,AT5G61850,myc234_49h_rCol_rH_up,49h,Col under High R/FR,up,GO:0010077, floral meristem identity control protein LEAFY (LFY) ,LFY;LFY3,maintenance of inflorescence meristem identity,"The process in which an organism retains a population of inflorescence meristem cells, preventing the commitment of all stem cell progeny to a differentiated cell fate."
470,AT1G18710,myc234_49h_rCol_rH_up,49h,Col under High R/FR,up,GO:0030154, myb domain protein 47 ,AtMYB47;MYB47,cell differentiation,"The process in which relatively unspecialized cells, e.g. embryonic or regenerative cells, acquire specialized structural and/or functional features that characterize the cells, tissues, or organs of the mature organism or some other relatively stable phase of the organism's life history. Differentiation includes the processes involved in commitment of a cell to a specific fate and its subsequent development to the mature state."
471,AT5G61420,myc234_49h_rCol_rH_up,49h,Col under High R/FR,up,GO:0030154, myb domain protein 28 ,AtMYB28;HAG1;MYB28;PMG1,cell differentiation,"The process in which relatively unspecialized cells, e.g. embryonic or regenerative cells, acquire specialized structural and/or functional features that characterize the cells, tissues, or organs of the mature organism or some other relatively stable phase of the organism's life history. Differentiation includes the processes involved in commitment of a cell to a specific fate and its subsequent development to the mature state."
472,AT1G69120,myc234_49h_rCol_rH_up,49h,Col under High R/FR,up,GO:0030154, K-box region and MADS-box transcription factor family protein  ,AGL7;AP1;AtAP1,cell differentiation,"The process in which relatively unspecialized cells, e.g. embryonic or regenerative cells, acquire specialized structural and/or functional features that characterize the cells, tissues, or organs of the mature organism or some other relatively stable phase of the organism's life history. Differentiation includes the processes involved in commitment of a cell to a specific fate and its subsequent development to the mature state."
473,AT4G18960,myc234_49h_rCol_rH_up,49h,Col under High R/FR,up,GO:0030154, K-box region and MADS-box transcription factor family protein  ,AG,cell differentiation,"The process in which relatively unspecialized cells, e.g. embryonic or regenerative cells, acquire specialized structural and/or functional features that characterize the cells, tissues, or organs of the mature organism or some other relatively stable phase of the organism's life history. Differentiation includes the processes involved in commitment of a cell to a specific fate and its subsequent development to the mature state."
474,AT2G45660,myc234_49h_rCol_rH_up,49h,Col under High R/FR,up,GO:0030154, AGAMOUS-like 20 ,AGL20;ATSOC1;SOC1,cell differentiation,"The process in which relatively unspecialized cells, e.g. embryonic or regenerative cells, acquire specialized structural and/or functional features that characterize the cells, tissues, or organs of the mature organism or some other relatively stable phase of the organism's life history. Differentiation includes the processes involved in commitment of a cell to a specific fate and its subsequent development to the mature state."
475,AT5G60890,myc234_49h_rCol_rH_up,49h,Col under High R/FR,up,GO:0030154, myb domain protein 34 ,AtATR1;ATMYB34;ATR1;MYB34,cell differentiation,"The process in which relatively unspecialized cells, e.g. embryonic or regenerative cells, acquire specialized structural and/or functional features that characterize the cells, tissues, or organs of the mature organism or some other relatively stable phase of the organism's life history. Differentiation includes the processes involved in commitment of a cell to a specific fate and its subsequent development to the mature state."
476,AT5G60910,myc234_49h_rCol_rH_up,49h,Col under High R/FR,up,GO:0030154, AGAMOUS-like 8 ,AGL8;FUL,cell differentiation,"The process in which relatively unspecialized cells, e.g. embryonic or regenerative cells, acquire specialized structural and/or functional features that characterize the cells, tissues, or organs of the mature organism or some other relatively stable phase of the organism's life history. Differentiation includes the processes involved in commitment of a cell to a specific fate and its subsequent development to the mature state."
477,AT4G24540,myc234_49h_rCol_rH_up,49h,Col under High R/FR,up,GO:0030154, AGAMOUS-like 24 ,AGL24,cell differentiation,"The process in which relatively unspecialized cells, e.g. embryonic or regenerative cells, acquire specialized structural and/or functional features that characterize the cells, tissues, or organs of the mature organism or some other relatively stable phase of the organism's life history. Differentiation includes the processes involved in commitment of a cell to a specific fate and its subsequent development to the mature state."
478,AT3G12810,myc234_49h_rCol_rH_up,49h,Col under High R/FR,up,GO:0030154, SNF2 domain-containing protein / helicase domain-containing protein ,chr13;PIE1;SRCAP,cell differentiation,"The process in which relatively unspecialized cells, e.g. embryonic or regenerative cells, acquire specialized structural and/or functional features that characterize the cells, tissues, or organs of the mature organism or some other relatively stable phase of the organism's life history. Differentiation includes the processes involved in commitment of a cell to a specific fate and its subsequent development to the mature state."
479,AT1G74430,myc234_49h_rCol_rH_up,49h,Col under High R/FR,up,GO:0030154, myb domain protein 95 ,ATMYB95;ATMYBCP66;MYB95,cell differentiation,"The process in which relatively unspecialized cells, e.g. embryonic or regenerative cells, acquire specialized structural and/or functional features that characterize the cells, tissues, or organs of the mature organism or some other relatively stable phase of the organism's life history. Differentiation includes the processes involved in commitment of a cell to a specific fate and its subsequent development to the mature state."
480,AT5G61850,myc234_49h_rCol_rH_up,49h,Col under High R/FR,up,GO:0030154, floral meristem identity control protein LEAFY (LFY) ,LFY;LFY3,cell differentiation,"The process in which relatively unspecialized cells, e.g. embryonic or regenerative cells, acquire specialized structural and/or functional features that characterize the cells, tissues, or organs of the mature organism or some other relatively stable phase of the organism's life history. Differentiation includes the processes involved in commitment of a cell to a specific fate and its subsequent development to the mature state."
481,AT2G33810,myc234_49h_rCol_rH_up,49h,Col under High R/FR,up,GO:0030154, squamosa promoter binding protein-like 3 ,SPL3,cell differentiation,"The process in which relatively unspecialized cells, e.g. embryonic or regenerative cells, acquire specialized structural and/or functional features that characterize the cells, tissues, or organs of the mature organism or some other relatively stable phase of the organism's life history. Differentiation includes the processes involved in commitment of a cell to a specific fate and its subsequent development to the mature state."
